## **The impact of human activities on Australian wildlife**

Alyce Taylor-Brown<sup>1,2</sup>, Rosie Booth<sup>3</sup>, Amber Gillett<sup>3</sup>, Erica Mealy<sup>4</sup>, Steven Ogbourne<sup>1</sup>, Adam Polkinghorne<sup>2</sup>, Gabriel C. Conroy<sup>1\*</sup>

<sup>1</sup> Genecology Research Centre, University of the Sunshine Coast, Maroochydore, Queensland, Australia

<sup>2</sup> Animal Research Centre, University of the Sunshine Coast, Maroochydore, Queensland, Australia

<sup>3</sup> Australia Zoo Wildlife Hospital, Beerwah, Queensland, Australia

<sup>4</sup> Faculty of Arts, Business and Law, University of the Sunshine Coast, Maroochydore, Queensland, Australia

\*Corresponding author

E-mail: [gconroy@usc.edu.au](mailto:gconroy@usc.edu.au) (GC)

**Short title:** What is killing Australian wildlife?

## 1 Abstract

2           Increasing human population size and the concomitant expansion of urbanisation  
3 significantly impact natural ecosystems and native fauna globally. Successful conservation  
4 management relies on precise information on the factors associated with wildlife population  
5 decline, which are challenging to acquire from natural populations. Wildlife Rehabilitation  
6 Centres (WRC) provide a rich source of this information. However, few researchers have  
7 conducted large-scale longitudinal studies, with most focussing on narrow taxonomic ranges,  
8 suggesting that WRC-associated data remains an underutilised resource, and may provide a  
9 fuller understanding of the anthropogenic threats facing native fauna.

10           We analysed admissions and outcomes data from a WRC in Queensland, Australia Zoo  
11 Wildlife Hospital, to determine the major factors driving admissions and morbidity of native  
12 animals in a region experiencing rapid and prolonged urban expansion.

13           We studied 31,626 admissions of 83 different species of native birds, reptiles,  
14 amphibians, marsupials and eutherian mammals from 2006 to 2017. While marsupial  
15 admissions were highest (41.3%), admissions increased over time for all species and exhibited  
16 seasonal variation (highest in Spring to Summer), consistent with known breeding seasons.

17           Causes for admission typically associated with human influenced activities were  
18 dominant and exhibited the highest mortality rates. Car strikes were the most common reason  
19 for admission (34.7%), with dog attacks (9.2%), entanglements (7.2%), and cat attacks (5.3%)  
20 also high. Admissions of orphaned young and overt signs of disease were significant at 24.6%  
21 and 9.7%, respectively. Mortality rates were highest following dog attacks (72.7%) and car  
22 strikes (69.1%) and lowest in orphaned animals (22.1%).

23           Our results show that WRC databases offer rich opportunities for wildlife monitoring  
24 and provide quantification of the negative impacts of human activities on ecosystem stability

25 and wildlife health. The imminent need for urgent, proactive conservation management to  
26 ameliorate the negative impacts of human activities on wildlife is clearly evident from our  
27 results.

## 28 Introduction

29           There is substantive evidence to suggest that anthropogenic factors are having  
30 devastating consequences on native fauna, both in Australia [1-9] and internationally [10-26].  
31 The stability of entire ecosystems is consistently compromised through the process of urban  
32 expansion and global population growth, which continue to increase at unprecedented rates  
33 [27]. The sustained acceleration in human population growth and resulting expansion in  
34 anthropogenic activities appear to be the primary causes of an accelerated increase in extinction  
35 rates globally [28-32].

36           Global population growth contributes to the destruction, modification and  
37 fragmentation of wildlife habitat, reduced genetic diversity, threats from pathogens, the spread  
38 of exotic and invasive species, air, noise and light pollution, alteration in natural hydrologic  
39 and fire regimes, and a rapidly changing climate [33-37]. The consequences of these  
40 environmental changes for most species include a reduced ability to forage, reduced prey or  
41 food availability, altered immune function, and diminished breeding success [38-45]. Changes  
42 to any of these life traits can compromise the persistence of native fauna populations in the  
43 wild.

44           Conception and implementation of effective conservation management strategies  
45 should be guided by a thorough understanding of the underlying causes of wildlife population  
46 decline [18, 19, 46-48]. Evaluation of longitudinal data from wildlife rehabilitation centres  
47 (WRC), including causes of admission and resultant outcomes, can be used to conduct general  
48 wildlife monitoring and investigate threats to local species [6-8, 13, 18, 19, 23, 24, 26, 47, 49-  
49 53], and may provide information about ecosystem health and stability [53, 54], quantify and  
50 delineate natural and anthropogenic elements that present potential hazards to wildlife survival.

51           Previous research using WRC admissions data has generally concentrated on either a  
52 single species or narrow taxonomic clusters [6-8, 15, 17, 20, 23, 50, 55, 56], with

53 understandable foci on threatened taxa. Others have focused on particular threats, such as cat  
54 attacks, land clearing and emerging diseases [16, 21, 22, 25, 57], which have increased as  
55 human activities have encroached on wildlife habitat [26, 58].

56 This study takes a broader perspective, by examining a wide suite of species in South-  
57 East Queensland (QLD), Australia, including representatives from a variety of taxonomic, life  
58 history and trophic groups. The overall objective of this research was to investigate the major  
59 causes and patterns of WRC admissions and outcomes, with a sub-aim of identifying  
60 opportunities to provide targeted management solutions. The results of this longitudinal  
61 retrospective study have wide ramifications, particularly where impacts from anthropogenic  
62 processes are implicated.

## 63 *Methods*

### 64 *Study site*

65 We collated hospital records from the Australia Zoo Wildlife Hospital (AZWH) in  
66 Beerwah, Queensland. AZWH has collected data from all wildlife admissions since its opening  
67 in 2004. AZWH is located 80 km north of Brisbane, on the Sunshine Coast, which is a rapidly  
68 growing residential and tourist area, with mixed land use comprising a combination of rural,  
69 urban, peri-urban, bushland and coastal zones. The majority of AZWH admissions come from  
70 an area spanning approximately 200 km north (to Maryborough, with occasional admissions  
71 from as far north as Proserpine), 150 km west (e.g. Gatton and Kingaroy) and up to 300 km  
72 south (Lismore, New South Wales; mostly Koala admissions) (Figure 1), although admissions  
73 from central western QLD and the Northern Territory also sporadically occur.

74 AZWH was established as a wildlife treatment facility (previously The Australian  
75 Wildlife Hospital) in March 2004. Due to a rapidly growing wildlife admission rate, a new  
76 purpose-built facility was constructed in November 2008 and is one of the largest WRCs in the

77 world. The AZWH facilities include multiple state of the art triage assessment areas, intensive  
78 care and rehabilitation wards customised for birds, reptiles, mammals and orphaned young;  
79 radiology, laboratory, surgery and pathology facilities; and multiple large outdoor  
80 rehabilitation enclosures. It operates 24 hours a day with a team of wildlife veterinarians, vet  
81 nurses and volunteers attending to the needs of up to 8,000 wildlife admissions annually.

## 82 *Data collection*

83 Data for 74,230 admissions between 1<sup>st</sup> January 2006 and 31<sup>st</sup> December 2017 were  
84 obtained from AZWH. Of these, 42,604 admission records were excluded as follows: a) data  
85 for which there were unknown, multiple, or ambiguous cause for admission (CFA) were  
86 removed from the analysis; b) admissions of animals that were dead on arrival (DOA); c)  
87 species for which there were less than 100 admissions over the time period, unless they could  
88 be suitably pooled and were a taxonomic group of interest e.g. Amphibians (see below); d)  
89 admissions of marine animals, which occupy a specific niche that we believe warrants its own  
90 detailed investigation in future studies (with the exception of the Australian pelican which had  
91 significant admission numbers from predominantly freshwater sources); e) admissions for  
92 which the outcome was not reported.

93 Where data on a single species was insufficient (i.e. <100 admissions) for meaningful  
94 analysis of admission and outcome trends following the exclusion criteria above, but the  
95 species was part of a larger taxonomic or ecological group of interest, we pooled these species  
96 to create a ‘multi-species group’ (Supporting File 1). Species were grouped based on either  
97 taxonomy (e.g. ‘small macropods’ are small-bodied species within the Macropodidae family,  
98 compared to Eastern grey kangaroos for example, which are larger macropods) or behaviour  
99 (e.g. raptors are a group of birds of prey that include representatives from several families)  
100 (Supporting File 1). For simplicity, taxa are referred to by their higher taxonomic groupings,

101 termed ‘animal groups’ throughout the manuscript (i.e. avians, reptiles, amphibians, marsupial  
102 mammals and eutherian mammals; Supporting File 1).

103 The final dataset of 31,626 individual admissions included terrestrial and freshwater  
104 wildlife species of differing age classes, taxonomic classes and trophic groups. These data were  
105 analysed for admission and outcome trends. Where trends were assessed per season, seasons  
106 are referred to as; Summer: December, January, February; Autumn: March, April, May;  
107 Winter: June, July, August; Spring: September, October, November. CFA were listed as per  
108 their categories in the admission/accession sheets, with some CFA pooled (e.g. Bush fire and  
109 fire; Supporting file 2). Animal outcomes following admission were also grouped into either  
110 ‘positive outcome’ (release into wild or into care) or ‘mortality’ (natural death and euthanasia  
111 on welfare grounds).

112 Throughout the period of interest for this study, various alterations were made to the  
113 data collection methods at AZWH in response to the expansion of overall admissions and  
114 improvements in data capture methodology. Changes included; 1) intermittent updating  
115 (addition or deletion of some CFA categories) of animal admission/accession sheets; 2)  
116 restructuring of animal admission/accession sheets and redevelopment of the internal database  
117 (largely in mid-2013). Subsequently, some CFA categories were subject to change throughout  
118 the study period and may not have been clearly represented in data prior to mid-2013. To assess  
119 whether these changes might significantly alter the main findings, we performed a small subset  
120 analysis on data from 2014-2017 to evaluate any shifts in the main CFA after the changes.

## 121 *Data analysis*

122 The aggregate data used for this study was sourced and processed through MySQL  
123 using 117 lines of SQL queries layered upon a set of 3 (112 lines total) SQL/PSM functions  
124 (Structured Query Language/ Persistent Stored Modules) [59]. Designed to maximise

125 consistency of data, and also to allow the pooling of outcomes and species, the functions were  
126 used to filter and aggregate the raw data and to generate comma separated (csv) files. One  
127 exception was the per month/year data that was further processed using simple Java command-  
128 line application of 230 lines of code to collate the up to 3,700 data values for each of eight  
129 sheets.

130 The csv files were imported into Microsoft Excel and manipulated into tables of total  
131 admitted animals, causes for admission and outcomes, and grouped according to higher  
132 classification. Microsoft Excel was also used to calculate the summary statistics (totals, means  
133 and proportions), and to generate graphical outputs.

#### 134 *Statistical analysis*

135 Data were imported into IBM SPSS Statistics v24.0 [60] and reformatted where  
136 necessary. Data were assessed for distribution prior to parametric or non-parametric inferential  
137 analyses. For data with normal distribution, we performed one-way ANOVA with a Tukey  
138 Post-hoc test, and for data with non-normal distribution, we performed Kruskal-Wallis  
139 ANOVA. We used a statistical significance level of 0.05, and also performed odds-ratio  
140 analysis using the risk estimate statistic in the cross-tabs option, with a 95% confidence  
141 interval.

#### 142 *Results*

143 We studied 31,626 native animal admissions to the AZWH, a large WRC in Beerwah,  
144 Queensland, Australia, and the outcomes of those admissions, from January 2006 to December  
145 2017. A summary of admissions over this time period is found in Table 1. A total of 83 species  
146 were included in this study, which were grouped by taxonomy, ecological niche or behavioural  
147 traits to assist analysis (Supporting File 1).



148 **Table 1:** Summary of admissions to AZWH from 2006 to 2017.

| Animal group      | Species                        | Number of admissions | % of total admissions | % of animal group | % Positive outcome <sup>1</sup> | % Mortality <sup>2</sup> | Leading CFA     |
|-------------------|--------------------------------|----------------------|-----------------------|-------------------|---------------------------------|--------------------------|-----------------|
| <b>AVIANS</b>     | <b>Australian Brush-turkey</b> | 431                  | 1.4%                  | 3.9%              | 31.1%                           | 68.9%                    | HBC             |
|                   | <b>Australian Magpie</b>       | 1263                 | 4.0%                  | 11.3%             | 37.1%                           | 62.9%                    | HBC             |
|                   | <b>Australian Pelican</b>      | 245                  | 0.8%                  | 2.2%              | 83.3%                           | 16.7%                    | Entanglements   |
|                   | <b>Fig Bird</b>                | 762                  | 2.4%                  | 6.8%              | 51.8%                           | 48.2%                    | Orphaned        |
|                   | <b>Laughing Kookaburra</b>     | 1741                 | 5.5%                  | 15.6%             | 37.3%                           | 62.7%                    | HBC             |
|                   | <b>Lorikeets</b>               | 2625                 | 8.3%                  | 23.6%             | 24.8%                           | 75.2%                    | HBC             |
|                   | <b>Native Ducks</b>            | 948                  | 3.0%                  | 8.5%              | 67.3%                           | 32.7%                    | Orphaned        |
|                   | <b>Noisy Minor</b>             | 842                  | 2.7%                  | 7.6%              | 39.1%                           | 60.9%                    | Entanglements   |
|                   | <b>Raptors</b>                 | 351                  | 1.1%                  | 3.2%              | 44.4%                           | 55.6%                    | HBC             |
|                   | <b>Tawny Frog Mouth</b>        | 1920                 | 6.1%                  | 17.3%             | 27.1%                           | 72.9%                    | HBC             |
|                   |                                |                      | <b>11128</b>          | <b>35.2%</b>      |                                 | <b>44.3%</b>             | <b>55.7%</b>    |
| <b>REPTILES</b>   | <b>Bearded Dragon</b>          | 404                  | 1.3%                  | 8.8%              | 31.4%                           | 68.6%                    | HBC             |
|                   | <b>Blue-tongued Skink</b>      | 930                  | 2.9%                  | 20.4%             | 27.6%                           | 72.4%                    | Dog attack      |
|                   | <b>Carpet Python</b>           | 888                  | 2.8%                  | 19.4%             | 51.0%                           | 49.0%                    | HBC             |
|                   | <b>Eastern Water Dragon</b>    | 856                  | 2.7%                  | 18.7%             | 39.3%                           | 60.7%                    | HBC             |
|                   | <b>Freshwater Turtle</b>       | 646                  | 2.0%                  | 14.1%             | 52.9%                           | 47.1%                    | HBC             |
|                   | <b>Green Tree Snake</b>        | 243                  | 0.8%                  | 5.3%              | 42.4%                           | 57.6%                    | Cat attack      |
|                   | <b>Lace Monitor</b>            | 306                  | 1.0%                  | 6.7%              | 43.8%                           | 56.2%                    | HBC             |
|                   | <b>Venomous Snakes</b>         | 295                  | 0.9%                  | 6.5%              | 52.5%                           | 47.5%                    | Cat attack      |
|                   |                                |                      | <b>4568</b>           | <b>14.4%</b>      |                                 | <b>42.6%</b>             | <b>57.4%</b>    |
| <b>AMPHIBIANS</b> | <b>Tree Frogs</b>              | 106                  | 0.3%                  | 100.0%            | 32.1%                           | 67.9%                    | HBC             |
|                   |                                |                      | <b>106</b>            | <b>0.3%</b>       |                                 | <b>32.1%</b>             | <b>67.9%</b>    |
| <b>MARSUPIALS</b> | <b>Bandicoots</b>              | 367                  | 1.2%                  | 2.8%              | 42.2%                           | 57.8%                    | Orphaned        |
|                   | <b>Eastern Grey Kangaroo</b>   | 1165                 | 3.7%                  | 8.9%              | 30.6%                           | 69.4%                    | HBC             |
|                   | <b>Feathertail Glider</b>      | 230                  | 0.7%                  | 1.8%              | 63.0%                           | 37.0%                    | Cat attack      |
|                   | <b>Koala</b>                   | 3590                 | 11.4%                 | 27.5%             | 44.8%                           | 55.2%                    | HBC             |
|                   | <b>Large Gliders</b>           | 754                  | 2.4%                  | 5.8%              | 55.2%                           | 44.8%                    | Orphaned        |
|                   | <b>Marsupial Dasyurid</b>      | 190                  | 0.6%                  | 1.5%              | 73.7%                           | 26.3%                    | Orphaned        |
|                   | <b>Possums</b>                 | 5615                 | 17.8%                 | 43.0%             | 43.8%                           | 56.2%                    | Orphaned        |
|                   | <b>Small Macropods</b>         | 1139                 | 3.6%                  | 8.7%              | 47.2%                           | 52.8%                    | Orphaned        |
|                   |                                | <b>13050</b>         | <b>41.3%</b>          |                   | <b>50.1%</b>                    | <b>49.9%</b>             | <b>Orphaned</b> |
| <b>EUTHERIANS</b> | <b>Echidna</b>                 | 453                  | 1.4%                  | 16.3%             | 51.9%                           | 48.1%                    | HBC             |
|                   | <b>Flying Foxes</b>            | 2026                 | 6.4%                  | 73.0%             | 56.7%                           | 43.3%                    | Entanglements   |
|                   | <b>Microbats</b>               | 295                  | 0.9%                  | 10.6%             | 65.8%                           | 34.2%                    | Cat attack      |
|                   |                                |                      | <b>2774</b>           | <b>8.8%</b>       |                                 | <b>58.1%</b>             | <b>41.9%</b>    |

|                                             |              |              |              |
|---------------------------------------------|--------------|--------------|--------------|
| <b>Total / proportion of all admissions</b> | <b>31626</b> | <b>42.6%</b> | <b>57.4%</b> |
| <b>Mean proportion of all admissions</b>    |              | <b>46.4%</b> | <b>53.6%</b> |

149 <sup>1</sup> Positive outcome includes rehabilitation, sent to carer and released to wild

150 <sup>2</sup> Mortality includes unassisted death and euthanised on site

### 151 *Animal admissions*

152 Mammals represented the majority of admissions to AZWH at 51.1% ( $n = 15,824$ )  
153 (Table 1). Possums (nocturnal marsupials belonging to the Phalangeridae family) were the most  
154 commonly admitted multi-species group, with 17.8% ( $n = 5,615$ ) of admissions over the study  
155 period. This was closely followed by admissions of koalas (threatened arboreal marsupials;  
156 *Phascolarctos cinereus*), at 11.4% ( $n = 3,590$ ), making them the most commonly admitted  
157 single species (Table 1, Figure 2a). Eastern grey kangaroos (*Macropus giganteus*) and small  
158 macropods (a multi-species group comprising wallabies and pademelons in the Macropodidae  
159 family; Supporting File 1) comprised 3.7% ( $n = 1,165$ ) and 3.6% ( $n = 1,139$ ) of all admissions,  
160 respectively. Flying foxes (*Pteropus alecto* and *P. poliocephalus*) were the main eutherian  
161 mammal admitted ( $n = 2774$ ; 8.8% of admissions), and the fourth most commonly admitted  
162 taxa overall (6.4%;  $n = 2,026$ ) (Table 1).

163 Avians were the second most admitted animal group, accounting for 35.2% ( $n = 11,128$ )  
164 of all admissions (Table 1). The most commonly admitted avian species were lorikeets  
165 (colourful psittacines common to Eastern Australia;  $n = 2,625$ ) accounting for 23.6% of avian  
166 admissions and 8.3% of admissions overall, and tawny frogmouths (nocturnal birds related to  
167 nightjars; *Podargus strigoides*;  $n = 1,920$ ); whilst high numbers of laughing kookaburras  
168 (*Dacelo novaeguineae*; the largest species in the Kingfisher family) and Australian magpies  
169 (*Gymnorhina tibicen*; omnivorous passerine songbirds) were also admitted ( $n = 1,741$  and  
170  $n = 1,263$ , respectively).

171 The reptile group contributed 14.4% ( $n = 4,368$ ) of all admissions, represented by six  
172 individual species and two multi-species groups (Table 1, Supporting File 1). Blue-tongued  
173 skinks (short legged diurnal lizards; *Tiliqua scincoides*), carpet pythons (large semi-arboreal  
174 pythons with a wide distribution; *Morelia spilota*) and eastern water dragons (arboreal lizards  
175 in the Agamidae family; *Intellagama lesueurii*) were the three most commonly admitted  
176 reptilian taxa, together comprising 8.5% of all admissions ( $n = 930, 888$  and  $856$ , respectively;  
177 Table 1, Figure 2a). The remaining 0.3% ( $n = 106$ ) of admissions were attributed to amphibians,  
178 represented in our study only by tree frogs (*Litoria caerulea* and *Litoria gracilentia*) (Table 1).

179 We observed a steady increase in the total number of admissions over the study period,  
180 with almost a 3-fold increase in annual admissions from 2006 ( $n = 1,216$ ) to 2017 ( $n = 3,582$ )  
181 (Figure 2b, Supporting Table 1, Supporting Figure 1a). The average annual admission rate  
182 equated to 2,635.5 animals per year ( $\pm 744.8$ ). The number of admissions of each animal group  
183 also increased steadily, with avians and marsupials showing the greatest increases in admission,  
184 at more than 300% throughout the study period (avians;  $n = 318$  to  $1,147$  and marsupials;  $n =$   
185  $562$  to  $1,505$ ) (Supporting Table 1, Supporting Figure 1, Supporting Figure 2a and 2d).

186 Seasonal admission trends were apparent in the dataset: the greatest number of  
187 admissions occurred annually in spring, with a mean difference of 356.8 (5.5%) from autumn  
188 ( $p < 0.001$ ). Interestingly though, each animal group exhibited a different seasonal profile.  
189 Mean bird admissions were highest in spring, as were mammal admissions, while reptile  
190 admission peaks occurred largely in summer (Figure 2c, Supporting Figures 1 and 2).

### 191 *Causes for admission*

192 Causes for admission ( $n = 31,626$ ) are summarised in Table 2 and Figure 3. The most  
193 common CFA was ‘hit by car’ (HBC), accounting for 10,973 admissions (34.7%), followed by  
194 ‘orphaned/dependent young’ (24.6%;  $n = 7,771$ ), ‘overt signs of disease’ (9.7%;  $n = 3,057$ ),

195 **Table 2:** Admissions to AZWH in each CFA, presented as proportion of each species or multi-species group.

| Species                                 | <i>N</i><br>Known<br>COA | Abnor<br>mal<br>animal<br>locatio<br>n | Boat<br>Strike | Cat<br>Attack | Dog<br>Attack | Drown<br>ing | Electro<br>cuted | Entang<br>lement<br>s <sup>1</sup> | Fell<br>out of<br>tree | Fire <sup>2</sup> | Fishin<br>g<br>tackle<br>ingesti<br>on | Hit by<br>Car | Hit<br>windo<br>w | Machi<br>ne<br>injury<br>poisoni<br>ng | Malici<br>ous<br>injury/<br>predati<br>on | Natura<br>l<br>Oiling | Orpha<br>ned/<br>Depen<br>dent<br>Young | Overt<br>signs<br>of<br>disease | Tree<br>felling |              |
|-----------------------------------------|--------------------------|----------------------------------------|----------------|---------------|---------------|--------------|------------------|------------------------------------|------------------------|-------------------|----------------------------------------|---------------|-------------------|----------------------------------------|-------------------------------------------|-----------------------|-----------------------------------------|---------------------------------|-----------------|--------------|
| <b>Australian<br/>Brush-turkey</b>      | 431                      | 1.2%                                   | 0.0%           | 28.5%         | 14.4%         | 0.9%         | 0.0%             | 9.3%                               | 0.2%                   | 0.0%              | 0.0%                                   | 32.5%         | 0.2%              | 0.2%                                   | 1.6%                                      | 5.1%                  | 0.0%                                    | 4.4%                            | 1.4%            | 0.0%         |
| <b>Australian<br/>Magpie</b>            | 1263                     | 1.3%                                   | 0.0%           | 2.5%          | 3.6%          | 0.2%         | 0.2%             | 7.4%                               | 3.3%                   | 0.0%              | 0.1%                                   | 33.8%         | 0.4%              | 0.1%                                   | 3.7%                                      | 2.9%                  | 0.7%                                    | 28.0%                           | 11.6%           | 0.1%         |
| <b>Australian<br/>Pelican</b>           | 245                      | 1.6%                                   | 0.4%           | 0.0%          | 0.4%          | 0.0%         | 0.0%             | 66.1%                              | 0.0%                   | 0.0%              | 2.9%                                   | 2.4%          | 0.0%              | 0.0%                                   | 8.2%                                      | 0.0%                  | 0.0%                                    | 0.4%                            | 17.6%           | 0.0%         |
| <b>Fig Bird</b>                         | 762                      | 0.4%                                   | 0.0%           | 7.7%          | 0.5%          | 0.1%         | 0.0%             | 0.5%                               | 4.7%                   | 0.0%              | 0.0%                                   | 24.7%         | 4.9%              | 0.3%                                   | 0.4%                                      | 3.1%                  | 0.0%                                    | 51.3%                           | 1.2%            | 0.1%         |
| <b>Laughing<br/>Kookaburra</b>          | 1741                     | 1.3%                                   | 0.0%           | 1.1%          | 3.1%          | 4.9%         | 0.0%             | 5.5%                               | 1.3%                   | 0.0%              | 0.0%                                   | 69.6%         | 0.9%              | 0.0%                                   | 0.6%                                      | 1.3%                  | 0.6%                                    | 8.8%                            | 0.7%            | 0.2%         |
| <b>Lorikeets</b>                        | 2625                     | 3.1%                                   | 0.0%           | 2.9%          | 3.7%          | 0.5%         | 0.0%             | 1.1%                               | 1.1%                   | 0.0%              | 0.0%                                   | 41.4%         | 5.9%              | 0.0%                                   | 0.3%                                      | 2.4%                  | 0.1%                                    | 6.4%                            | 29.6%           | 1.5%         |
| <b>Native Ducks</b>                     | 948                      | 1.1%                                   | 0.0%           | 1.7%          | 2.1%          | 0.2%         | 0.0%             | 3.5%                               | 0.1%                   | 0.0%              | 0.3%                                   | 19.6%         | 0.3%              | 0.0%                                   | 1.3%                                      | 1.3%                  | 0.2%                                    | 66.2%                           | 2.1%            | 0.0%         |
| <b>Noisy Minor</b>                      | 842                      | 1.0%                                   | 0.0%           | 11.0%         | 2.5%          | 0.8%         | 0.0%             | 1.4%                               | 3.6%                   | 0.0%              | 0.0%                                   | 43.3%         | 1.8%              | 0.1%                                   | 0.4%                                      | 2.7%                  | 0.4%                                    | 29.7%                           | 1.3%            | 0.0%         |
| <b>Raptors</b>                          | 351                      | 4.0%                                   | 0.0%           | 0.0%          | 0.9%          | 2.0%         | 0.0%             | 10.8%                              | 1.4%                   | 0.0%              | 0.3%                                   | 57.8%         | 2.8%              | 0.3%                                   | 2.6%                                      | 3.4%                  | 0.0%                                    | 10.0%                           | 3.7%            | 0.0%         |
| <b>Tawny Frog<br/>Mouth</b>             | 1920                     | 1.1%                                   | 0.0%           | 0.5%          | 0.9%          | 0.2%         | 0.1%             | 6.0%                               | 1.5%                   | 0.0%              | 0.0%                                   | 73.0%         | 0.6%              | 0.1%                                   | 0.8%                                      | 1.3%                  | 0.0%                                    | 10.8%                           | 3.3%            | 0.0%         |
| <b>Total</b>                            | 11128                    | 186                                    | 1              | 427           | 323           | 125          | 4                | 624                                | 194                    | 0                 | 12                                     | 5216          | 252               | 7                                      | 135                                       | 241                   | 28                                      | 2206                            | 1101            | 46           |
| <b>Proportion of all<br/>admissions</b> |                          | 0.59%                                  | 0.00%          | 1.35%         | 1.02%         | 0.40%        | 0.01%            | 1.97%                              | 0.61%                  | 0.00%             | 0.04%                                  | 16.49%        | 0.80%             | 0.02%                                  | 0.43%                                     | 0.76%                 | 0.09%                                   | 6.98%                           | 3.48%           | 0.15%        |
| <b>Proportion of animal<br/>group</b>   |                          | 1.67%                                  | 0.01%          | 3.84%         | 2.90%         | 1.12%        | 0.04%            | 5.61%                              | 1.74%                  | 0.00%             | 0.11%                                  | 46.87%        | 2.26%             | 0.06%                                  | 1.21%                                     | 2.17%                 | 0.25%                                   | 19.82%                          | 9.89%           | 0.41%        |
| <b>Proportion of<br/>CFA</b>            |                          | <b>30.7%</b>                           | <b>100.0%</b>  | <b>25.6%</b>  | <b>11.1%</b>  | <b>54.3%</b> | <b>2.3%</b>      | <b>27.4%</b>                       | <b>42.5%</b>           | <b>0.0%</b>       | <b>33.3%</b>                           | <b>47.5%</b>  | <b>92.6%</b>      | <b>5.0%</b>                            | <b>46.9%</b>                              | <b>43.0%</b>          | <b>63.6%</b>                            | <b>28.4%</b>                    | <b>36.0%</b>    | <b>31.7%</b> |
| <b>Bearded<br/>Dragon</b>               | 404                      | 0.7%                                   | 0.0%           | 6.4%          | 22.0%         | 0.2%         | 0.0%             | 1.0%                               | 0.2%                   | 0.2%              | 0.0%                                   | 46.0%         | 0.0%              | 1.2%                                   | 0.7%                                      | 0.7%                  | 0.0%                                    | 17.3%                           | 2.7%            | 0.2%         |
| <b>Blue-tongued<br/>Skink</b>           | 930                      | 0.6%                                   | 0.0%           | 10.3%         | 57.5%         | 1.3%         | 0.0%             | 0.6%                               | 0.0%                   | 0.0%              | 0.0%                                   | 14.2%         | 0.0%              | 2.0%                                   | 0.6%                                      | 0.9%                  | 0.0%                                    | 10.4%                           | 1.3%            | 0.1%         |

|                                     |      |              |             |              |              |              |             |              |             |              |              |              |             |              |              |              |             |             |             |              |
|-------------------------------------|------|--------------|-------------|--------------|--------------|--------------|-------------|--------------|-------------|--------------|--------------|--------------|-------------|--------------|--------------|--------------|-------------|-------------|-------------|--------------|
| <b>Carpet Python</b>                | 888  | 2.3%         | 0.0%        | 1.5%         | 11.7%        | 0.2%         | 0.1%        | 8.1%         | 0.5%        | 0.1%         | 0.0%         | 45.8%        | 0.0%        | 4.5%         | 1.7%         | 1.8%         | 0.1%        | 17.3%       | 3.9%        | 0.3%         |
| <b>Eastern Water Dragon</b>         | 856  | 2.1%         | 0.0%        | 10.9%        | 21.6%        | 0.9%         | 0.0%        | 8.2%         | 0.0%        | 0.0%         | 0.0%         | 22.5%        | 0.0%        | 1.6%         | 1.4%         | 8.1%         | 0.2%        | 20.6%       | 1.9%        | 0.0%         |
| <b>Freshwater Turtle</b>            | 646  | 4.5%         | 0.0%        | 0.2%         | 3.3%         | 0.2%         | 0.0%        | 6.0%         | 0.0%        | 0.0%         | 3.7%         | 71.4%        | 0.0%        | 0.6%         | 0.3%         | 0.6%         | 0.0%        | 7.3%        | 2.0%        | 0.0%         |
| <b>Green Tree Snake</b>             | 243  | 1.2%         | 0.0%        | 28.4%        | 27.2%        | 0.0%         | 0.0%        | 8.2%         | 0.4%        | 0.0%         | 0.0%         | 21.4%        | 0.0%        | 2.5%         | 0.4%         | 1.2%         | 0.0%        | 7.0%        | 1.2%        | 0.8%         |
| <b>Lace Monitor</b>                 | 306  | 0.3%         | 0.0%        | 1.0%         | 23.9%        | 0.0%         | 0.0%        | 1.0%         | 0.3%        | 0.0%         | 0.0%         | 51.3%        | 0.0%        | 0.3%         | 0.7%         | 0.0%         | 0.0%        | 6.2%        | 2.0%        | 13.1%        |
| <b>Venomous Snakes</b>              | 295  | 2.0%         | 0.0%        | 31.9%        | 14.2%        | 0.3%         | 0.0%        | 17.3%        | 0.0%        | 0.0%         | 0.0%         | 14.2%        | 0.0%        | 5.1%         | 3.1%         | 1.7%         | 0.3%        | 8.1%        | 1.4%        | 0.3%         |
| <b>Total</b>                        | 4568 | 86           | 0           | 395          | 1115         | 25           | 1           | 265          | 7           | 2            | 24           | 1630         | 0           | 104          | 50           | 108          | 4           | 604         | 100         | 48           |
| <b>Proportion of all admissions</b> |      | 0.27%        | 0.00%       | 1.25%        | 3.53%        | 0.08%        | 0.00%       | 0.84%        | 0.02%       | 0.01%        | 0.08%        | 5.15%        | 0.00%       | 0.33%        | 0.16%        | 0.34%        | 0.01%       | 1.91%       | 0.32%       | 0.15%        |
| <b>Proportion of animal group</b>   |      | 1.88%        | 0.00%       | 8.65%        | 24.41%       | 0.55%        | 0.02%       | 5.80%        | 0.15%       | 0.04%        | 0.53%        | 35.68%       | 0.00%       | 2.28%        | 1.09%        | 2.36%        | 0.09%       | 13.22%      | 2.19%       | 1.05%        |
| <b>Proportion of CFA</b>            |      | <b>14.2%</b> | <b>0.0%</b> | <b>23.7%</b> | <b>38.3%</b> | <b>10.9%</b> | <b>0.6%</b> | <b>11.7%</b> | <b>1.5%</b> | <b>13.3%</b> | <b>66.7%</b> | <b>14.9%</b> | <b>0.0%</b> | <b>73.8%</b> | <b>17.4%</b> | <b>19.3%</b> | <b>9.1%</b> | <b>7.8%</b> | <b>3.3%</b> | <b>33.1%</b> |
| <b>Tree Frogs</b>                   | 106  | 6.6%         | 0.0%        | 8.5%         | 11.3%        | 0.9%         | 0.0%        | 3.8%         | 0.0%        | 0.0%         | 0.0%         | 34.9%        | 0.0%        | 7.5%         | 2.8%         | 12.3%        | 0.9%        | 0.9%        | 9.4%        | 0.0%         |
| <b>Total</b>                        | 106  | 7            | 0           | 9            | 12           | 1            | 0           | 4            | 0           | 0            | 0            | 37           | 0           | 8            | 3            | 13           | 1           | 1           | 10          | 0            |
| <b>Proportion of all admissions</b> |      | 0.02%        | 0.00%       | 0.03%        | 0.04%        | 0.00%        | 0.00%       | 0.01%        | 0.00%       | 0.00%        | 0.00%        | 0.12%        | 0.00%       | 0.03%        | 0.01%        | 0.04%        | 0.00%       | 0.00%       | 0.03%       | 0.00%        |
| <b>Proportion of animal group</b>   |      | 6.60%        | 0.00%       | 8.49%        | 11.32%       | 0.94%        | 0.00%       | 3.77%        | 0.00%       | 0.00%        | 0.00%        | 34.91%       | 0.00%       | 7.55%        | 2.83%        | 12.26%       | 0.94%       | 0.94%       | 9.43%       | 0.00%        |
| <b>Proportion of CFA</b>            |      | <b>1.2%</b>  | <b>0.0%</b> | <b>0.5%</b>  | <b>0.4%</b>  | <b>0.4%</b>  | <b>0.0%</b> | <b>0.2%</b>  | <b>0.0%</b> | <b>0.0%</b>  | <b>0.0%</b>  | <b>0.3%</b>  | <b>0.0%</b> | <b>5.7%</b>  | <b>1.0%</b>  | <b>2.3%</b>  | <b>2.3%</b> | <b>0.0%</b> | <b>0.3%</b> | <b>0.0%</b>  |
| <b>Bandicoots</b>                   | 367  | 1.1%         | 0.0%        | 18.0%        | 11.2%        | 5.4%         | 0.0%        | 0.5%         | 0.0%        | 0.3%         | 0.0%         | 24.5%        | 0.0%        | 1.1%         | 0.0%         | 1.1%         | 0.0%        | 35.4%       | 1.1%        | 0.3%         |
| <b>Eastern Grey Kangaroo</b>        | 1165 | 0.3%         | 0.0%        | 0.0%         | 4.4%         | 0.1%         | 0.0%        | 7.3%         | 0.1%        | 0.0%         | 0.0%         | 43.4%        | 0.0%        | 0.0%         | 0.3%         | 0.1%         | 0.0%        | 38.8%       | 5.2%        | 0.0%         |
| <b>Feathertail Glider</b>           | 230  | 8.3%         | 0.0%        | 49.6%        | 3.5%         | 1.7%         | 0.0%        | 0.4%         | 2.6%        | 0.4%         | 0.0%         | 0.0%         | 0.0%        | 0.0%         | 0.0%         | 0.0%         | 2.2%        | 27.0%       | 0.9%        | 3.5%         |
| <b>Koala</b>                        | 3590 | 2.1%         | 0.0%        | 0.0%         | 13.8%        | 0.3%         | 0.0%        | 0.7%         | 2.2%        | 0.1%         | 0.0%         | 36.4%        | 0.0%        | 0.0%         | 0.0%         | 0.2%         | 0.0%        | 10.5%       | 33.6%       | 0.1%         |
| <b>Large Gliders</b>                | 754  | 1.3%         | 0.0%        | 24.7%        | 6.1%         | 0.3%         | 0.1%        | 21.8%        | 3.8%        | 0.0%         | 0.0%         | 4.0%         | 0.1%        | 0.1%         | 0.4%         | 3.4%         | 0.0%        | 30.8%       | 1.2%        | 1.9%         |

|                                         |              |              |             |              |              |              |              |              |              |              |             |              |             |              |              |              |              |              |              |              |      |
|-----------------------------------------|--------------|--------------|-------------|--------------|--------------|--------------|--------------|--------------|--------------|--------------|-------------|--------------|-------------|--------------|--------------|--------------|--------------|--------------|--------------|--------------|------|
| <b>Marsupial Dasyurid</b>               | 190          | 1.1%         | 0.0%        | 7.9%         | 2.1%         | 0.0%         | 0.0%         | 0.0%         | 0.0%         | 0.0%         | 0.0%        | 0.0%         | 0.5%        | 0.0%         | 0.0%         | 0.5%         | 0.5%         | 0.0%         | 86.3%        | 1.1%         | 0.0% |
| <b>Possums</b>                          | 5615         | 2.1%         | 0.0%        | 6.4%         | 10.8%        | 0.2%         | 2.0%         | 0.5%         | 2.1%         | 0.1%         | 0.0%        | 22.3%        | 0.0%        | 0.2%         | 1.5%         | 2.4%         | 0.1%         | 41.2%        | 7.9%         | 0.3%         |      |
| <b>Small Macropods</b>                  | 1139         | 0.1%         | 0.0%        | 0.2%         | 3.2%         | 0.4%         | 0.0%         | 2.2%         | 0.0%         | 0.0%         | 0.0%        | 31.7%        | 0.0%        | 0.0%         | 0.2%         | 0.3%         | 0.0%         | 58.5%        | 3.3%         | 0.0%         |      |
| <b>Total</b>                            | 13050        | 230          | 0           | 745          | 1291         | 51           | 116          | 330          | 231          | 11           | 0           | 3546         | 1           | 16           | 93           | 173          | 9            | 4397         | 1764         | 46           |      |
| <b>Proportion of all admissions</b>     |              | 0.73%        | 0.00%       | 2.36%        | 4.08%        | 0.16%        | 0.37%        | 1.04%        | 0.73%        | 0.03%        | 0.00%       | 11.21%       | 0.00%       | 0.05%        | 0.29%        | 0.55%        | 0.03%        | 13.90%       | 5.58%        | 0.15%        |      |
| <b>Proportion of animal group</b>       |              | 1.76%        | 0.00%       | 5.71%        | 9.89%        | 0.39%        | 0.89%        | 2.53%        | 1.77%        | 0.08%        | 0.00%       | 27.17%       | 0.01%       | 0.12%        | 0.71%        | 1.33%        | 0.07%        | 33.69%       | 13.52%       | 0.35%        |      |
| <b>Proportion of CFA</b>                |              | <b>38.0%</b> | <b>0.0%</b> | <b>44.7%</b> | <b>44.3%</b> | <b>22.2%</b> | <b>65.9%</b> | <b>14.5%</b> | <b>50.5%</b> | <b>73.3%</b> | <b>0.0%</b> | <b>32.3%</b> | <b>0.4%</b> | <b>11.3%</b> | <b>32.3%</b> | <b>30.8%</b> | <b>20.5%</b> | <b>56.6%</b> | <b>57.7%</b> | <b>31.7%</b> |      |
| <b>Echidna</b>                          | 453          | 1.8%         | 0.0%        | 0.2%         | 13.9%        | 0.9%         | 0.0%         | 0.7%         | 0.0%         | 0.2%         | 0.0%        | 72.2%        | 0.0%        | 0.9%         | 0.0%         | 0.0%         | 0.0%         | 7.5%         | 1.5%         | 0.2%         |      |
| <b>Flying Foxes</b>                     | 2026         | 1.6%         | 0.0%        | 0.6%         | 5.2%         | 0.2%         | 2.7%         | 51.0%        | 1.0%         | 0.0%         | 0.0%        | 10.3%        | 0.4%        | 0.0%         | 0.2%         | 1.2%         | 0.0%         | 22.7%        | 2.7%         | 0.1%         |      |
| <b>Microbats</b>                        | 295          | 18.6%        | 0.0%        | 26.1%        | 1.4%         | 6.4%         | 0.3%         | 4.7%         | 1.4%         | 0.3%         | 0.0%        | 3.1%         | 3.7%        | 0.7%         | 0.7%         | 0.7%         | 0.3%         | 23.7%        | 7.1%         | 0.7%         |      |
| <b>Total</b>                            | 2774         | 96           | 0           | 91           | 172          | 28           | 55           | 1051         | 25           | 2            | 0           | 544          | 19          | 6            | 7            | 26           | 2            | 563          | 82           | 5            |      |
| <b>Proportion of all admissions</b>     |              | 0.30%        | 0.00%       | 0.29%        | 0.54%        | 0.09%        | 0.17%        | 3.32%        | 0.08%        | 0.01%        | 0.00%       | 1.72%        | 0.06%       | 0.02%        | 0.02%        | 0.08%        | 0.01%        | 1.78%        | 0.26%        | 0.02%        |      |
| <b>Proportion of animal group</b>       |              | 3.46%        | 0.00%       | 3.28%        | 6.20%        | 1.01%        | 1.98%        | 37.89%       | 0.90%        | 0.07%        | 0.00%       | 19.61%       | 0.68%       | 0.22%        | 0.25%        | 0.94%        | 0.07%        | 20.30%       | 2.96%        | 0.18%        |      |
| <b>Proportion of CFA</b>                |              | <b>15.9%</b> | <b>0.0%</b> | <b>5.5%</b>  | <b>5.9%</b>  | <b>12.2%</b> | <b>31.3%</b> | <b>46.2%</b> | <b>5.5%</b>  | <b>13.3%</b> | <b>0.0%</b> | <b>5.0%</b>  | <b>7.0%</b> | <b>4.3%</b>  | <b>2.4%</b>  | <b>4.6%</b>  | <b>4.5%</b>  | <b>7.2%</b>  | <b>2.7%</b>  | <b>3.4%</b>  |      |
| <b>TOTAL</b>                            |              |              |             |              |              |              |              |              |              |              |             |              |             |              |              |              |              |              |              |              |      |
| <b>NUMBER of admissions per CFA</b>     | <b>31626</b> | <b>605</b>   | <b>1</b>    | <b>1667</b>  | <b>2913</b>  | <b>230</b>   | <b>176</b>   | <b>2274</b>  | <b>36</b>    | <b>457</b>   | <b>15</b>   | <b>10973</b> | <b>272</b>  | <b>141</b>   | <b>288</b>   | <b>561</b>   | <b>44</b>    | <b>7771</b>  | <b>3057</b>  | <b>145</b>   |      |
| <b>PROPORTION (%) of all admissions</b> |              | <b>1.9%</b>  | <b>0.0%</b> | <b>5.3%</b>  | <b>9.2%</b>  | <b>0.7%</b>  | <b>0.6%</b>  | <b>7.2%</b>  | <b>0.1%</b>  | <b>1.4%</b>  | <b>0.0%</b> | <b>34.7%</b> | <b>0.9%</b> | <b>0.4%</b>  | <b>0.9%</b>  | <b>1.8%</b>  | <b>0.1%</b>  | <b>24.6%</b> | <b>9.7%</b>  | <b>0.5%</b>  |      |

196 <sup>1</sup> Entanglements includes netting, fencing, fishing line and other entanglements

197 <sup>2</sup> Fire includes bush and other fires

198 ‘dog attack’ (9.2%;  $n = 2,913$ ), ‘entanglement’ (7.2%;  $n = 2,274$ ) and ‘cat attack’ (5.3%;  $n =$   
199 1,667). These six causes together constituted 90.6% of all admissions (28,655/31,626) and  
200 accounted for 64.4% to 100% of admissions for individual taxa. Only four CFA affected all 30  
201 study taxa (abnormal animal location, dog attack, orphaned young, and overt signs of disease),  
202 with the remaining CFA applicable for 1 to 29 species or groups (mean 20.5) (Table 2).

203 Car strikes were the leading cause for admission of 16 out of 19 taxa (Table 1). Avians  
204 were the most common group admitted for road trauma (16.5% of all admissions) with 47.5%  
205 (5,216/11,128) of avians admitted in this CFA. This mainly comprised tawny frogmouths,  
206 laughing kookaburras and lorikeets, which each had over 1,000 admissions (Figure 3,  
207 Supporting Table 2). Marsupials and reptiles were also heavily affected by car strikes,  
208 accounting for 11.2% and 5.2% of all admissions, respectively (Table 2) with approximately a  
209 third of all marsupials (27.2%) and reptiles (35.7%) admitted for this affliction (Figure 3, Table  
210 2). More specifically, koalas and possums together accounted for over 70% of marsupial car  
211 strikes (2,558/3,546) whilst freshwater turtles accounted for the highest proportion of reptile  
212 car strikes (28.2; 461/1630).

213 The second highest admission category was ‘orphaned or dependent young’, which  
214 accounted for 24.6% of all admissions ( $n = 7,771$ ). Marsupials were most frequently admitted  
215 in this category (56.6% of orphaned admissions;  $n = 4,397$ ; Table 2, Figure 3), with possums  
216 alone contributing over half of these (2,314/4,397). Avians together contributed a further  
217 28.4% ( $n = 2,206$ ), mainly consisting of native ducks ( $n = 628$ ).

218 ‘Overt signs of disease’ was one of four CFA shared by all studied species and was the  
219 third highest CFA overall (Figure 3). This CFA accounted for high proportions of koala (e.g.  
220 chlamydial disease) and lorikeet (e.g. lorikeet paralysis) admissions, at 33.6% ( $n = 1,207$ ) and  
221 29.6% ( $n = 777$ ), respectively. Overt signs of disease also accounted for 17.6% of Australian  
222 pelican admissions (e.g. botulism-like symptoms).

223 'Dog attack' was the fourth most common CFA (9.2% of admissions). Marsupials  
224 made up the largest proportion of dog attack admissions (44.3%;  $n = 1,291$ ) and was the CFA  
225 for 9.9% of marsupials. Dog attacks accounted for 10.8% to 13.8% of possum, bandicoot and  
226 koala admissions (Table 2). Reptiles comprised a further 38.3% of dog attack admissions, with  
227 24.4% ( $n = 1,1115$ ) of reptiles admitted for this reason (Table 2, Supporting Table 2). In  
228 particular, 57.2% of blue-tongue skink admissions ( $n = 535$ ) were due to dog attacks.

229 'Entanglements' (e.g. fence or fruit netting entanglements) accounted for 7.2% of all  
230 admissions ( $n = 2,274$ ). Eutherian mammals made up 46.2% of all entanglement admissions  
231 (Table 2, Figure 3). This mainly consisted of flying foxes ( $n = 1,034$ ), for which entanglement  
232 accounted for 51.0% of admissions. Avians comprised a further 27.4% of entanglements ( $n =$   
233  $1,253$ ), with a heavy proportion of Australian Pelicans admitted following entanglement  
234 (66.1%;  $n = 162$ ; Table 2, Supporting Table 2). Entanglements also represented a sizeable  
235 proportion of large glider admissions (21.8%;  $n = 164$ ). This multi-species group consists of  
236 the greater glider, squirrel glider and sugar glider, which are comparable in size to flying foxes.

237 'Cat attack' rounded out the top six CFA at 5.3% of all admissions ( $n = 1,667$ ). Cat  
238 attacks accounted for 49.6% of feathertail glider admissions ( $n = 114$ ), and over 20% of  
239 admissions of Australian brush turkeys, green tree snakes, venomous snakes, large gliders and  
240 microbats (Table 2). Over 8% of both reptiles and amphibians were admitted due to cat attacks  
241 (Supporting Table 2).

242 Some animals had unique or specific CFA that were distinct from the top six CFA.  
243 Reptiles were commonly admitted for 'machine injury', which includes incidents involving  
244 lawn mowers, grass cutters, whipper snippers, chainsaws, tractor slashers etc (Figure 3). Carpet  
245 pythons were also highly represented ( $n = 40$ ) in this category (Table 2). The most common  
246 CFA for amphibians was HBC ( $n = 37$ ), but they were also prone to dog attacks and 'natural  
247 predation' (native predator attack resulting in injury;  $n = 12$  and  $13$ , respectively). In fact,



248 natural predation accounted for 12.3% ( $n = 13$ ) of amphibian and 8.1% ( $n = 69$ ) of eastern  
249 water dragon admissions (Table 2, Supporting Table 2). Lace monitor admissions were  
250 primarily the result of tree-felling (13.1%;  $n = 40$ ), which results in injury or displacement.  
251 ‘Abnormal animal location’ was a common CFA for microbats and feathertail gliders (18.6%;  
252  $n = 55$  and 8.3%;  $n = 19$ , respectively; Table 2), whereby they may be found on the ground, in  
253 unsuitable locations within building infrastructure, or other locations compromising their  
254 welfare. A small percentage of animals (0.9%, 288/31,626) were admitted for ‘malicious injury  
255 or poisoning’, where injury or illness was suspected due to a malicious act. Australian pelicans  
256 appeared to be overrepresented in this category ( $n = 20$ , 8.2% of pelican admissions), though  
257 this may be the result of assignment of some pelicans affected by botulism-related disease to  
258 this category (Table 2). Eight animal species were affected by ‘fire’, which includes bush fire  
259 and other fire, and ‘electrocution’. Admissions resulting from fire-related events were mostly  
260 restricted to mammals (Table 2). Electrocution largely affected arboreal animals from all  
261 groups, with possums and flying foxes most commonly admitted under this category. Birds and  
262 bats were infrequently admitted for hitting a window, whilst ‘fishing tackle ingestion’  
263 admissions were restricted to birds and freshwater turtles (Table 2). Laughing kookaburras  
264 were the most commonly admitted species in the ‘drowning’ ( $n = 86$ ) and ‘oiling’ categories  
265 ( $n = 11$ ) and lorikeets in the ‘hit window’ ( $n = 155$ ) category.

266 Consistent with the overall increase in admissions over time, admissions due to each of  
267 the top six CFA increased considerably over the study period, with these six CFA increasing  
268 by up to ten-fold between 2006 and 2017 (Figure 4a, Supporting Figure 3).

269 Some CFA exhibited cyclic trends (Figure 4b, Supporting Figure 4). Admissions of  
270 orphaned animals were clearly seasonal (admissions in spring were statistically different from  
271 admissions in autumn, winter and summer ( $p = 0.001$ , 0.018, 0.016, respectively; Figure 4b),  
272 with avian and marsupial admissions increasing from late winter, and remaining high

273 throughout spring and summer (Supporting Figure 4). Entanglements peaked in spring, and  
274 dog attack admissions were highest overall during late winter and spring.

### 275 *Outcomes of admission*

276 Animal outcomes following admission were grouped simply into either ‘positive  
277 ‘outcome’ or ‘mortality’. Positive outcomes included release into wild or into care, whilst  
278 mortality encompassed both natural death and euthanasia on welfare grounds.

279 Mortality was listed as the outcome for the majority of animals (57.4%;  $n = 18,153$ ),  
280 with an average mortality rate of 53.6% (Table 1, Figure 5). Overall mortality among birds and  
281 reptiles was slightly greater than the average (55.7% and 57.4%, respectively; Table 1), whilst  
282 mortality in amphibians was highest at 67.9% (72/106). Lorikeets had the highest mortality  
283 rate at 75.2%, whilst Australian pelicans had the lowest mortality rate at 16.7% (Figure 5a).

284 Deaths due to HBC accounted for 26.0% of all admissions (8,208/31,626; Table 3).  
285 Mortality rates among individual species attributed to HBC ranged from 44.4% (microbats;  
286 4/9) to 92.5% (eastern grey kangaroo; 468/506), with an overall mortality rate of 74.8%, and a  
287 mean mortality rate of 69.1% (Table 3, Supporting Figure 5). HBC also had the highest odds  
288 ratio for mortality at 3.3 (Table 4).

289 Dog attacks had the highest mean mortality rate at 72.7%, with 80.8% and 80.4%  
290 mortality rates in avians and reptiles, respectively (Table 3). The relative risk of dog attack was  
291 second only to HBC, at 1.333, and the odds ratio for mortality ranged from 0.542 in amphibians  
292 to 3.741 in reptiles (Table 4, Supporting Table 4). Cat attacks also resulted in high mortality  
293 rates, ranging from 39.1% in green tree snakes to 81.3% in native ducks (with the omission of  
294 animals that had fewer than 4 cat attack admissions; Table 3, Supporting Figure 5). The relative  
295 risk for cat attacks (1.126) was lower than that for dog attacks (Table 4).

296 **Table 3:** Outcomes of the top six CFA for each species or multi-species group.

| Animal group | Outcomes                                | Cat attack   |                  | Dog attack   |                  | Entanglements |                  | HBC          |                  | Orphaned     |                  | Overt signs of disease |                  |
|--------------|-----------------------------------------|--------------|------------------|--------------|------------------|---------------|------------------|--------------|------------------|--------------|------------------|------------------------|------------------|
|              |                                         | Mortalit y   | Positive outcome | Mortalit y   | Positive outcome | Mortalit y    | Positive outcome | Mortalit y   | Positive outcome | Mortalit y   | Positive outcome | Mortalit y             | Positive outcome |
| AVIANS       | Australian Brush-turkey                 | 52.0%        | 48.0%            | 80.6%        | 19.4%            | 62.5%         | 37.5%            | 86.4%        | 13.6%            | 52.6%        | 47.4%            | 83.3%                  | 16.7%            |
|              | Australian Magpie                       | 75.0%        | 25.0%            | 88.9%        | 11.1%            | 57.4%         | 42.6%            | 82.9%        | 17.1%            | 35.9%        | 64.1%            | 66.4%                  | 33.6%            |
|              | Australian Pelican                      | 0.0%         | 0.0%             | 0.0%         | 100.0%           | 11.1%         | 88.9%            | 50.0%        | 50.0%            | 0.0%         | 100.0%           | 32.6%                  | 67.4%            |
|              | Fig Bird                                | 78.0%        | 22.0%            | 100.0%       | 0.0%             | 75.0%         | 25.0%            | 77.7%        | 22.3%            | 23.0%        | 77.0%            | 33.3%                  | 66.7%            |
|              | Laughing Kookaburra                     | 57.9%        | 42.1%            | 87.0%        | 13.0%            | 65.6%         | 34.4%            | 71.3%        | 28.7%            | 15.0%        | 85.0%            | 84.6%                  | 15.4%            |
|              | Lorikeets                               | 72.4%        | 27.6%            | 75.0%        | 25.0%            | 75.9%         | 24.1%            | 76.9%        | 23.1%            | 26.2%        | 73.8%            | 94.9%                  | 5.1%             |
|              | Native Ducks                            | 81.3%        | 18.8%            | 70.0%        | 30.0%            | 54.5%         | 45.5%            | 78.5%        | 21.5%            | 12.9%        | 87.1%            | 85.0%                  | 15.0%            |
|              | Noisy Minor                             | 79.6%        | 20.4%            | 85.7%        | 14.3%            | 91.7%         | 8.3%             | 75.6%        | 24.4%            | 28.8%        | 71.2%            | 45.5%                  | 54.5%            |
|              | Raptors                                 | 0.0%         | 0.0%             | 100.0%       | 0.0%             | 44.7%         | 55.3%            | 65.5%        | 34.5%            | 25.7%        | 74.3%            | 61.5%                  | 38.5%            |
|              | Tawny Frog Mouth                        | 77.8%        | 22.2%            | 76.5%        | 23.5%            | 75.0%         | 25.0%            | 80.4%        | 19.6%            | 25.1%        | 74.9%            | 81.0%                  | 19.0%            |
| <i>Total</i> |                                         | 294          | 133              | 261          | 62               | 318           | 306              | 4007         | 1209             | 508          | 1698             | 948                    | 153              |
|              | <i>Proportion per animal group</i>      | 68.9%        | 31.1%            | 80.8%        | 19.2%            | 51.0%         | 49.0%            | 76.8%        | 23.2%            | 23.0%        | 77.0%            | 86.1%                  | 13.9%            |
|              | <i>Mean proportion per animal group</i> | <b>57.4%</b> | <b>22.6%</b>     | <b>76.4%</b> | <b>23.6%</b>     | <b>61.3%</b>  | <b>38.7%</b>     | <b>74.5%</b> | <b>25.5%</b>     | <b>24.5%</b> | <b>75.5%</b>     | <b>66.8%</b>           | <b>33.2%</b>     |
| REPTILES     | Bearded Dragon                          | 69.2%        | 30.8%            | 83.1%        | 16.9%            | 50.0%         | 50.0%            | 83.3%        | 16.7%            | 12.9%        | 87.1%            | 72.7%                  | 27.3%            |
|              | Blue-tongued Skink                      | 65.6%        | 34.4%            | 84.5%        | 15.5%            | 33.3%         | 66.7%            | 88.6%        | 11.4%            | 5.2%         | 94.8%            | 66.7%                  | 33.3%            |
|              | Carpet Python                           | 53.8%        | 46.2%            | 67.3%        | 32.7%            | 19.4%         | 80.6%            | 69.0%        | 31.0%            | 2.6%         | 97.4%            | 65.7%                  | 34.3%            |
|              | Eastern Water Dragon                    | 66.7%        | 33.3%            | 82.2%        | 17.8%            | 35.7%         | 64.3%            | 87.6%        | 12.4%            | 9.7%         | 90.3%            | 93.8%                  | 6.3%             |
|              | Freshwater Turtle                       | 100.0%       | 0.0%             | 47.6%        | 52.4%            | 15.4%         | 84.6%            | 56.6%        | 43.4%            | 19.1%        | 80.9%            | 46.2%                  | 53.8%            |
|              | Green Tree Snake                        | 39.1%        | 60.9%            | 84.8%        | 15.2%            | 20.0%         | 80.0%            | 76.9%        | 23.1%            | 17.6%        | 82.4%            | 66.7%                  | 33.3%            |
|              | Lace Monitor                            | 100.0%       | 0.0%             | 74.0%        | 26.0%            | 0.0%          | 100.0%           | 59.9%        | 40.1%            | 36.8%        | 63.2%            | 100.0%                 | 0.0%             |
|              | Venomous Snakes                         | 48.9%        | 51.1%            | 66.7%        | 33.3%            | 13.7%         | 86.3%            | 81.0%        | 19.0%            | 0.0%         | 100.0%           | 100.0%                 | 0.0%             |
|              | <i>Total</i>                            |              | 227              | 168          | 896              | 219           | 60               | 205          | 1151             | 479          | 54               | 550                    | 72               |

|                                         |                                         |               |              |              |              |              |              |              |              |              |               |              |              |
|-----------------------------------------|-----------------------------------------|---------------|--------------|--------------|--------------|--------------|--------------|--------------|--------------|--------------|---------------|--------------|--------------|
|                                         | <i>Proportion per animal group</i>      | 57.5%         | 42.5%        | 80.4%        | 19.6%        | 22.6%        | 77.4%        | 70.6%        | 29.4%        | 8.9%         | 91.1%         | 72.0%        | 28.0%        |
|                                         | <i>Mean proportion per animal group</i> | <b>67.9%</b>  | <b>32.1%</b> | <b>73.8%</b> | <b>26.2%</b> | <b>23.5%</b> | <b>76.5%</b> | <b>75.4%</b> | <b>24.6%</b> | <b>13.0%</b> | <b>87.0%</b>  | <b>76.5%</b> | <b>23.5%</b> |
| AMPHIB-<br>IANS                         | <b>Tree Frogs</b>                       | 100.0%        | 0.0%         | 66.7%        | 33.3%        | 25.0%        | 75.0%        | 86.5%        | 13.5%        | 0.0%         | 100.0%        | 60.0%        | 40.0%        |
|                                         | <i>Total</i>                            | 9             | 0            | 8            | 4            | 1            | 3            | 32           | 5            | 0            | 1             | 6            | 4            |
|                                         | <i>Proportion per animal group</i>      | 100.0%        | 0.0%         | 66.7%        | 33.3%        | 25.0%        | 75.0%        | 86.5%        | 13.5%        | 0.0%         | 100.0%        | 60.0%        | 40.0%        |
|                                         | <i>Mean proportion per animal group</i> | <b>100.0%</b> | <b>0.0%</b>  | <b>66.7%</b> | <b>33.3%</b> | <b>25.0%</b> | <b>75.0%</b> | <b>86.5%</b> | <b>13.5%</b> | <b>0.0%</b>  | <b>100.0%</b> | <b>60.0%</b> | <b>40.0%</b> |
|                                         |                                         |               |              |              |              |              |              |              |              |              |               |              |              |
| MARSUP-<br>IALS                         | <b>Bandicoots</b>                       | 56.1%         | 43.9%        | 73.2%        | 26.8%        | 50.0%        | 50.0%        | 83.3%        | 16.7%        | 43.1%        | 56.9%         | 100.0%       | 0.0%         |
|                                         | <b>Eastern Grey Kangaroo</b>            | 0.0%          | 0.0%         | 94.1%        | 5.9%         | 91.8%        | 8.2%         | 92.5%        | 7.5%         | 36.5%        | 63.5%         | 68.9%        | 31.1%        |
|                                         | <b>Feathertail Glider</b>               | 45.6%         | 54.4%        | 50.0%        | 50.0%        | 0.0%         | 100.0%       | 0.0%         | 0.0%         | 37.1%        | 62.9%         | 0.0%         | 100.0%       |
|                                         | <b>Koala</b>                            | 100.0%        | 0.0%         | 54.8%        | 45.2%        | 64.0%        | 36.0%        | 60.1%        | 39.9%        | 35.5%        | 64.5%         | 58.4%        | 41.6%        |
|                                         | <b>Large Gliders</b>                    | 73.1%         | 26.9%        | 78.3%        | 21.7%        | 32.3%        | 67.7%        | 60.0%        | 40.0%        | 24.1%        | 75.9%         | 66.7%        | 33.3%        |
|                                         | <b>Marsupial Dasyurid</b>               | 60.0%         | 40.0%        | 50.0%        | 50.0%        | 0.0%         | 0.0%         | 0.0%         | 100.0%       | 22.0%        | 78.0%         | 0.0%         | 100.0%       |
|                                         | <b>Possums</b>                          | 72.0%         | 28.0%        | 82.4%        | 17.6%        | 71.4%        | 28.6%        | 81.5%        | 18.5%        | 28.8%        | 71.2%         | 76.6%        | 23.4%        |
|                                         | <b>Small Macropods</b>                  | 50.0%         | 50.0%        | 80.6%        | 19.4%        | 88.0%        | 12.0%        | 83.4%        | 16.6%        | 34.2%        | 65.8%         | 39.5%        | 60.5%        |
|                                         | <i>Total</i>                            | 496           | 249          | 923          | 368          | 190          | 140          | 2667         | 879          | 1365         | 3032          | 1110         | 654          |
|                                         | <i>Proportion per animal group</i>      | 66.6%         | 33.4%        | 71.5%        | 28.5%        | 57.6%        | 42.4%        | 75.2%        | 24.8%        | 31.0%        | 69.0%         | 62.9%        | 37.1%        |
| <i>Mean proportion per animal group</i> | <b>57.1%</b>                            | <b>30.4%</b>  | <b>70.4%</b> | <b>29.6%</b> | <b>49.7%</b> | <b>37.8%</b> | <b>57.6%</b> | <b>29.9%</b> | <b>32.7%</b> | <b>67.3%</b> | <b>51.3%</b>  | <b>48.7%</b> |              |
| EUTHER-<br>IANS                         | <b>Echidna</b>                          | 0.0%          | 100.0%       | 20.6%        | 79.4%        | 0.0%         | 100.0%       | 56.6%        | 43.4%        | 29.4%        | 70.6%         | 71.4%        | 28.6%        |
|                                         | <b>Flying Foxes</b>                     | 69.2%         | 30.8%        | 76.2%        | 23.8%        | 42.2%        | 57.8%        | 77.9%        | 22.1%        | 11.5%        | 88.5%         | 64.8%        | 35.2%        |
|                                         | <b>Microbats</b>                        | 63.6%         | 36.4%        | 100.0%       | 0.0%         | 28.6%        | 71.4%        | 44.4%        | 55.6%        | 10.0%        | 90.0%         | 33.3%        | 66.7%        |
|                                         | <i>Total</i>                            | 58            | 33           | 97           | 75           | 440          | 611          | 351          | 193          | 70           | 493           | 47           | 35           |
|                                         | <i>Proportion per animal group</i>      | 63.7%         | 36.3%        | 56.4%        | 43.6%        | 41.9%        | 58.1%        | 64.5%        | 35.5%        | 12.4%        | 87.6%         | 57.3%        | 42.7%        |
| <i>Mean proportion per animal group</i> | <b>44.3%</b>                            | <b>55.7%</b>  | <b>65.6%</b> | <b>34.4%</b> | <b>23.6%</b> | <b>76.4%</b> | <b>59.6%</b> | <b>40.4%</b> | <b>17.0%</b> | <b>83.0%</b> | <b>56.5%</b>  | <b>43.5%</b> |              |

|                                         |              |              |              |              |              |              |              |              |              |              |              |              |
|-----------------------------------------|--------------|--------------|--------------|--------------|--------------|--------------|--------------|--------------|--------------|--------------|--------------|--------------|
| <b>TOTAL NUMBER of admissions</b>       | <b>1084</b>  | <b>583</b>   | <b>2185</b>  | <b>728</b>   | <b>1009</b>  | <b>1265</b>  | <b>8208</b>  | <b>2765</b>  | <b>1997</b>  | <b>5774</b>  | <b>2183</b>  | <b>874</b>   |
| <b>Overall outcome rate (%)</b>         | <b>65.0%</b> | <b>35.0%</b> | <b>75.0%</b> | <b>25.0%</b> | <b>44.4%</b> | <b>55.6%</b> | <b>74.8%</b> | <b>25.2%</b> | <b>25.7%</b> | <b>74.3%</b> | <b>71.4%</b> | <b>28.6%</b> |
| <b>PROPORTION (%) of all admissions</b> | <b>3.4%</b>  | <b>1.8%</b>  | <b>6.9%</b>  | <b>2.3%</b>  | <b>3.2%</b>  | <b>4.0%</b>  | <b>26.0%</b> | <b>8.7%</b>  | <b>6.3%</b>  | <b>18.3%</b> | <b>6.9%</b>  | <b>2.8%</b>  |
| <b>Mean proportion of admissions</b>    | <b>60.2%</b> | <b>29.8%</b> | <b>72.7%</b> | <b>27.3%</b> | <b>43.1%</b> | <b>53.5%</b> | <b>69.1%</b> | <b>27.5%</b> | <b>22.1%</b> | <b>77.9%</b> | <b>64.0%</b> | <b>36.0%</b> |

297

298 **Table 4:** Odds ratio and relative risk analysis for the top six CFA.

| <b>CFA</b>             | <b>Outcome</b>   | <b>Number of admissions</b> |       | <b>Odds Ratio</b> | <b>Relative Risk</b> | <b>Chi-square; Fisher's exact</b> |
|------------------------|------------------|-----------------------------|-------|-------------------|----------------------|-----------------------------------|
| Hit by Car             | Mortality        | 8208                        | 10973 | 3.237             | 1.564                | 2023.648; 0.000                   |
|                        | Positive Outcome | 2765                        |       | 0.483             |                      |                                   |
| Orphaned               | Mortality        | 1997                        | 7771  | 0.146             | 0.366                | 4617.653; 0.000                   |
|                        | Positive Outcome | 5774                        |       | 2.497             |                      |                                   |
| Overt signs of disease | Mortality        | 2183                        | 3057  | 1.917             | 1.262                | 246.855; 0.000                    |
|                        | Positive Outcome | 874                         |       | 0.658             |                      |                                   |
| Dog attack             | Mortality        | 2185                        | 2913  | 2.334             | 1.333                | 378.239; 0.000                    |
|                        | Positive Outcome | 728                         |       | 0.571             |                      |                                   |
| Entanglements          | Mortality        | 1009                        | 2274  | 0.546             | 0.748                | 193.018; 0.000                    |
|                        | Positive Outcome | 1265                        |       | 1.368             |                      |                                   |
| Cat attack             | Mortality        | 1084                        | 1667  | 1.361             | 1.126                | 34.291; 0.000                     |
|                        | Positive Outcome | 583                         |       | 0.828             |                      |                                   |

300 The overall rate of positive outcomes was 42.6% ( $n = 13,473$ ), and the average rate of  
301 positive outcomes ranged from 32.1% for amphibians to 58.1% for eutherian mammals (Table  
302 1, Table 3, Supporting Table 3). Marsupials had 50.1% positive outcomes and 49.9% mortality  
303 across all CFA (Table 1).

304 Orphaned or dependent young carried the highest rate of positive outcomes (77.9%),  
305 which was high in all groups, ranging upwards from 69.0% of marsupials, and the associated  
306 relative risk of mortality for all species was only 0.366 (Table 3, Table 4). The relative risk of  
307 mortality was lower than average in avians, reptiles and eutherians (Supporting Table 4).  
308 Entanglements had a relatively high positive outcome rate, at 53.5% on average, with reptiles  
309 and eutherians exhibiting very high positive outcome rates (76.5% and 76.4%, respectively)  
310 (Table 3, Supporting Table 3). Relative risk of mortality was also low at 0.748, although the  
311 risk was higher for marsupials and eutherians (Table 4, Supporting Table 4).

312 Overall, increases in annual admissions were mirrored by increases in mortality rate  
313 (Figure 5b), however, this was not accompanied by a change to the average annual mortality  
314 rate. There were no prominent seasonal differences between positive and negative outcomes  
315 overall (Figure 5c).

## 316 Discussion

317 Native wildlife faces an ever-increasing range and magnitude of threats with the  
318 continuing increase of human population, associated urbanisation and anthropogenic-driven  
319 climate change being of immediate concern. Several studies have characterised declines in  
320 particular species or animal groups, whilst others have examined the impacts of a specific threat  
321 in a single biogeographical location, yet few have quantified the factors contributing to  
322 morbidities and mortalities longitudinally across a wide taxonomic range of native fauna.

323 This study has the widest breadth of any longitudinal analysis to date on the animals  
324 admitted to a WRC. It examines and critically analyses trends in admissions, causes for  
325 admission and animal outcomes over a twelve-year period at a WRC in South-East QLD,  
326 Australia. We observed a mean annual admission rate of 2,635 animals for the dataset  
327 examined, comparable to some previous studies in Europe, Africa and USA [19, 24, 26, 61,  
328 62]. Differences in admission rates between WRCs in different countries or biogeographical  
329 areas are largely a consequence of variations in species richness, human population density,  
330 local natural and anthropogenic threats, admission capacity and cultural attitudes to wildlife.

### 331 *WRC databases provide an opportunity for wildlife monitoring*

332 Mammalian and avian taxa were the most commonly admitted groups in our study,  
333 reflecting the abundance and diversity of these groups in South-East QLD. Mammals  
334 comprised over 50% ( $n = 15,826$ ) of our dataset, providing a wealth of knowledge regarding  
335 the diversity and abundance of these native animals in South-East QLD. Of these, koalas,  
336 possums and flying foxes were among the five most admitted animals overall, highlighting the  
337 need for us to understand the human-induced pressures placed on these animals. A further  
338 35.2% of our studied admissions were avians. This is considerably lower than other studies that  
339 report up to 57.1% [47] in the UK, and even 90% [63] in South Africa, whilst higher than a  
340 study from the USA (12.2%) [24].

341 We expect that these discrepancies are largely due to differences in species richness in  
342 SEQ compared to other regions [13, 23, 43, 49, 64, 65]. These differences will inform and  
343 influence monitoring efforts and conservation priorities. We focussed only on terrestrial and  
344 freshwater species (including avians), omitting marine species as we consider these to be  
345 threatened by distinct factors warranting their own analysis.



346 An overall increase in admissions was witnessed over the study period, which we  
347 believe is largely attributed to human population increases, as evidenced by the increase over  
348 time of admissions due to human-associated CFA. This is supported by human population  
349 growth in the Sunshine Coast region from 236,654 residents in 2006 to 303,389 in 2016 [66].  
350 The population is expected to reach 500,000 by 2031 [67], which we anticipate will result in  
351 further increases in wildlife admissions to AZWH.

### 352 *Human activities are contributing to the decline of Australian icons*

353 Given their iconic nature as representatives of the unique fauna found in Australia, and  
354 “vulnerable” status (up from “least concern” in 2008) [68], the health, welfare and conservation  
355 status of koalas continue to be of prime interest for the Australian public and the international  
356 community. Koala populations have suffered massive decline over the last 30 years,  
357 particularly in QLD, with recent localised population collapses documented [4, 5, 69].  
358 Emphasising the precarious nature of the koala’s survival in South-East QLD, koala admissions  
359 were high and constant throughout the study period, consistent with reports from other WRCs  
360 [1, 3-5, 69].

361 Major threats to the koala include habitat fragmentation, road trauma and disease [4,  
362 69]. Land clearing, to facilitate urban expansion and agriculture is also having devastating  
363 effects on the welfare of native fauna worldwide [37]. Whilst we did not directly measure  
364 habitat fragmentation in our study, most koala admissions were from urbanised areas with high  
365 numbers of car strikes, dog attacks and animals found in abnormal locations (e.g. telegraph  
366 poles and bridges), demonstrating a clear link between urban encroachment and its effect on  
367 koalas. Chlamydial disease is highly prevalent in koalas from South-East QLD and has been  
368 identified as a key threat to koala populations [70, 71]. As such, identifying and quantifying  
369 the prevalence of chlamydial disease in koalas is vital for ongoing management. Urogenital

370 disease caused by *Chlamydia pecorum* can diminish the fecundity of the population as it can  
371 lead to infertility, whilst ocular disease can lead to blindness and increased risk of morbidity.  
372 Overt chlamydial disease, in the form of a stained rump and inflamed exudative eyes, is one of  
373 the most common reasons for koala rescue and admissions to WRCs in South-East QLD, yet  
374 hospital databases may not always accurately capture this as a primary CFA. In 2013, AZWH  
375 revised their animal accession/admission data capture and on-site database to enhance both the  
376 quality of animal admission data and ability to report on CFA. This process included revisions  
377 to CFA categories and the inclusion of a category for ‘overt signs of disease’. As a result,  
378 admissions for overt signs of disease appeared to increase markedly from mid-2013 (Figure 4),  
379 yet realistically, the prevalence of overt chlamydial disease in koalas was similar to previous  
380 years. Our study was able to demonstrate how advances in the accuracy of data recording can  
381 result in an improved understanding of true threats to wildlife.

382         The most commonly admitted multi-species group in this study was possums, which  
383 are prolific in South-East QLD and thrive in urban areas. Due to their widespread nature and  
384 high density within urban and peri-urban regions, possums are predisposed to anthropogenic-  
385 related threats as demonstrated by high numbers of cat attacks, dog attacks and car strikes in  
386 this study, all of which resulted in high proportions of mortality (72.0%, 82.4% and 81.5%,  
387 respectively).

388         Another iconic Australian marsupial is the kangaroo. A recent study of eastern grey  
389 kangaroo with an overlapping study area, but also encompassing other regions of Australia,  
390 found that 42% of studied populations were in decline, with the most prominent impacts found  
391 in areas of high, ongoing urbanisation and transport infrastructure development [72]. In support  
392 of these findings, within our study area, 43.4% of eastern grey kangaroos were admitted due to  
393 car strike, with 92.5% of those incidents resulting in mortality; eastern grey kangaroos had the  
394 fourth highest total mortality rate. Interestingly, small macropods fared better than eastern grey

395 kangaroos following car strikes for which they were commonly admitted, with more than  
396 double the positive outcome rate (16.6%), which was contrary to expectations as they have  
397 similar physiological and behavioural traits other than body size. Overall these results reiterate  
398 the substantive negative impacts of building roads through remaining habitat or habitat linkage  
399 pathways of animals that are already vulnerable due to previous habitat modification and  
400 destruction at a landscape scale, in the absence of the implementation of adequate conservation  
401 strategies to mitigate the negative impact. By addressing factors such as vehicle density, vehicle  
402 speed, signage, road side habitat and lighting (including daylight savings time) and  
403 appropriately designed wildlife corridors, the impact of vehicle collisions can be reduced [3,  
404 16, 73]. However, the rate of human population expansion and urbanisation in our study area,  
405 as well as across many global regions, mean that vehicle associated wildlife mortality will still  
406 occur and likely constitutes one of the most prominent threats to the persistence of viable wild  
407 populations of many taxa.

408         The highest mortality rates of any taxa in this study were for lorikeets. Rainbow  
409 lorikeets are one of the most commonly observed birds in Australia with a natural distribution  
410 along the east coast [74] but are actually considered pests in other parts of Australia and New  
411 Zealand [75]. Whilst they were most commonly admitted in the hit window category, tree-  
412 felling and disease were also common reasons for lorikeets to be admitted. Disease resulted in  
413 a 94.9% mortality rate in lorikeets. Two diseases are primarily responsible for this: Psittacine  
414 beak and feather disease, a skin disease caused by *Circovirus* that is often fatal [76]; and  
415 necrotising enteritis, a gastrointestinal disease caused by *Clostridia spp* [77]. The latter is  
416 associated with altered dietary regimes associated with human habitat modification, or in some  
417 instances ingestion of inappropriate food directly sourced from humans in the form of garden  
418 bird-feeders and human food [77, 78], providing yet another example of the preventable impact  
419 of human activities on wildlife.

420 *Human-related CFA contribute to higher wildlife mortality rates*

421 Unfavourable outcomes were statistically more likely if the CFA was domestic cat or  
422 dog attack, car strike or entanglements. The combined average mortality rate of these four  
423 human-related CFA was 61.3%, with the relative risk of mortality ranging from 1.3 to 1.6  
424 compared to 0.4 and 0.7 for orphaning or overt signs of disease, respectively. These differences  
425 are due to the severity of the trauma caused by cats, dogs, cars and fencing and netting, which  
426 reduce the likelihood of successful rehabilitation, and are also likely underrepresented in our  
427 data given that orphaning would be in many instances a result of human linked impacts on the  
428 parents of orphaned individuals.

429 Entanglements were one of the human-related CFA responsible for a high proportion  
430 of admissions and mortality, again driving home the significant impact human activities have  
431 on a diverse range of wildlife. In the case of flying foxes, which were the fourth most  
432 commonly admitted taxa in our study, 51% were admitted on the basis of entanglements, which  
433 resulted in a 57.6% mortality rate. Whilst we grouped all types of entanglements due to  
434 insufficient data resolution within the source database, a recent study in Victoria showed that  
435 a high proportion of animals were admitted due to fruit netting entanglements (36.8%), where  
436 up to 56.1% of each entanglement subcategory resulted in mortality [6]. This was one of the  
437 highest mortality rates in our study and suggests that changes in land management practices  
438 may be the most effective way of ameliorating native wildlife mortality associated with  
439 entanglement, particularly for terrestrial taxa. Within the study region, several local councils  
440 have initiatives such as 'land for wildlife', partly aimed at converting conventional barbed-wire  
441 livestock fencing into wildlife friendly options, as well as reducing the use of monofilament  
442 netting which present entanglement risk to taxa such as flying foxes [79]. However, these  
443 efforts rely on goodwill from landholders, and there is no legislative requirement at either the  
444 local, state or federal level to enforce such practices. This highlights the need for consistent,

445 overarching policy to guide land management practices toward mitigation of unnecessary risk  
446 to native fauna.

447 Estimates in the USA place annual cat-related predation in the billions [21, 22], and  
448 predation of native animals by both feral and domestic cats in Australia is similarly devastating.  
449 For example, predation by feral cats has resulted in the early localised extinction of indigenous  
450 wildlife such as the western quoll (*Dasyurus geoffroii*) and golden bandicoot (*Isoodon*  
451 *auratus*), from islands off Western Australia [80], with more recent declines in numbers of  
452 other marsupials such as the northern brown bandicoot (*Isoodon macrourus*) in Northern  
453 Australia [9, 81, among other examples [81, 82, 83]. Cats are ubiquitous in Australia, with  
454 millions kept as pets that are permitted outdoors, and others free-ranging in urban environments  
455 and the wild [82-84]. Cat attacks have particularly serious effects on birds and reptiles, and  
456 microbats are also especially susceptible to cat trauma, demonstrated by 63.6% mortality in  
457 our study, 28.7% of bat casualties in a study in Italy [85] and around half of the traumatic  
458 deaths of bats found in Germany [86]. The cat attack admissions figures in our dataset are  
459 deceiving as we omitted animals that were DOA. Cats are generalist predators that are known  
460 to consume prey, which has also been documented in Northern Australia: birds, small mammals  
461 and small reptiles are common food sources when available [87]. Such mortalities were not  
462 captured in our dataset. Further, cat removal measures have resulted in reversal of population  
463 declines in some areas [88, 89] suggesting that such measures may be successful elsewhere.  
464 The culling of dingoes in many Australian jurisdictions has also been demonstrated to be  
465 detrimental to ecosystem functioning, as they act as top predators, often minimising the  
466 negative effects of feral mesopredators such as cats and foxes [90-93]. Further, cats do not only  
467 prey on native fauna but may also out-compete smaller bodied native predators such as quolls  
468 for resources [89], proving another, indirect, effect of the negative impact of such introduced  
469 species on our native fauna.

470 Dog attacks were another CFA resulting in significant mortality, with reptiles highly  
471 represented in this category. This is in agreement with another Australian study that showed  
472 around 49.2-52.4% of admissions of bluetongue lizards, which are common in backyards, were  
473 admitted following dog attacks, and 70% of all dog attack admissions did not recover [8]. A  
474 study in Tennessee however, reported far fewer admissions (only 6.1%) of reptiles due to dog  
475 attacks, where “human-induced trauma” was listed as the most common CFA for reptiles [24].  
476 Dog attacks were also responsible for high mortality rates of koalas in our study. This is another  
477 example of the value of local wildlife monitoring to ascertain the specific threats faced by  
478 wildlife in distinct regions.

#### 479 *The influence of animal morphology and behavioural traits on predisposition to threats*

480 Habitat characteristics, foraging practises, circadian movement patterns, size and other  
481 behavioural traits appear to predispose some taxa to certain threats, which are augmented by  
482 human-induced habitat alteration in the absence of suitable measures for impact reduction. The  
483 CFA for which this appears most clear is HBC, which was the leading CFA in our study. A  
484 detailed review of road trauma throughout Europe reported on average 2 to 8.5 million road  
485 kills per year among birds, reptiles and mammals (particularly ungulates) in countries such as  
486 the Netherlands, Belgium and Sweden [15]. The authors suggested that these animals are  
487 predisposed to vehicle collisions due to behavioural and ecological factors. A recent review of  
488 the propensity of wildlife to suffer from car strikes highlighted the increased risk for  
489 omnivorous avian taxa [94], which can be correlated in our study with the high rate of car  
490 strikes for tawny frogmouths, which are nocturnal omnivores with a tendency to hunt for  
491 insects that are attracted to car headlights on the road. Other avian species utilise roadside  
492 telegraph poles and fences as vantage points for hunting, further predisposing them to vehicle  
493 strikes [58].

494 Similarly, hedgehogs, which are nocturnal animals with morphological and behavioural  
495 traits resembling echidnas, (i.e. relatively slow movement, poor eyesight, limited defence  
496 against car strikes) have been documented to be profoundly affected by car strikes in the UK,  
497 with admission and mortality rates due to car strikes of 10.3% and over 85%, respectively [50].  
498 In our study echidnas had a much higher admission rate due to car strikes (72.2%) with a  
499 corresponding mortality rate of 56.6%. Other taxa, such as herpetofauna are predisposed to car  
500 hits as they may be drawn to the microclimate of a warm road, or they may be migrating to or  
501 from a hibernation site [51]. Turtles are also disadvantaged at evading car strikes due their slow  
502 speed, as evidenced by previous Australian research, that reported an 82.3% admission rate of  
503 Long-necked turtles over a 13-year study, with an overall mortality rate of 60.9% after impact  
504 with a motor vehicle. This is comparable to the mortality rate of freshwater turtles in our study  
505 at 56.6%, as well as the morbidity/mortality rate reported for three turtle species at a WRC in  
506 Virginia [95]. These findings are also consistent with a study that showed that maximum sprint  
507 speed may be a determinant of an animal's ability to evade injury or mortality associated with  
508 car strikes [94]. Further, Heigl *et al* reported a higher number of road-killed amphibians and  
509 reptiles on agricultural roads than municipal roads. Whilst we didn't measure this in our study,  
510 our common admissions area does include rural and bushland zones, so a similar trend may be  
511 apparent in our study.

512 We saw prominent differences in the admission and outcome rates of predatory,  
513 aggressive, or territorial birds versus more placid birds. For example, there were only 351  
514 admissions of raptors, which is a grouping of 17 species. Raptors were the only birds apart  
515 from pelicans and noisy minors that were almost never admitted due to cat or dog attack, with  
516 low admissions most likely to their low relative abundance, coupled with their behavioural  
517 characteristics, which comprise ambush attack on prey from high vantage points, with little  
518 time spent in vulnerable positions. Conversely, noisy minors, although smaller in body size

519 than raptors, are gregarious and territorial, forming colonies that can contain hundreds of birds  
520 providing a means of communal territory defence, which could explain the relative paucity of  
521 dog and cat attacks. These behavioural traits may also influence people's perceptions of the  
522 value of certain wildlife and the likelihood of presenting them to a WRC, for example in the  
523 case of noisy minors.

#### 524 *Severe weather events result in spikes in admissions*

525 Besides an overall increase in admissions over the course of our study, we observed  
526 several distinct peaks in total admissions (2010, 2014, 2016, 2017) that may be correlated with  
527 severe local weather events affecting the region of South-East QLD, Australia. December 2010  
528 recorded the “wettest December on record” with widespread heavy rainfall and thunderstorms,  
529 culminating in one of the most significant flood events in QLD's recorded history [96]. Flood  
530 events damage animal habitat and alter animal movement and behavioural patterns, often  
531 resulting in mortality, displacement, injury, stress or disease. We observed an expected increase  
532 in orphaned cases in December 2010, particularly for birds and marsupials. Reptile admissions  
533 did not show the same trend, which may reflect the ability of snakes in particular to traverse  
534 floodwaters by swimming. Animals capable of climbing, which are heavily represented in our  
535 dataset by arboreal marsupials, may not have been as heavily affected by flooding, but  
536 thunderstorms, such as the ‘super-cell’ that affected the city of Brisbane in South-East QLD  
537 (Figure 1) in November 2016 [97], likely resulted in mass animal displacement and injury,  
538 evidenced by a similar increase in orphan cases at that time. The same month also saw a  
539 heatwave in Kilcoy (~40 km west of AZWH), which, combined with recent land-clearing in  
540 the area, resulted in mass morbidity and mortalities of flying foxes.

541 Unusually dry and hot months were seen in Spring 2014, with QLD temperature records  
542 broken through October and November 2014 following ongoing and widespread drought [97],



543 prior to a damaging super cell storm in Brisbane at the end of November with heavy wind gusts  
544 and large hail stones [99]. These events coincide with peaks in avian and marsupial admissions.  
545 Similarly, 2017 was Australia's third-warmest year on record, with persistently warmer than  
546 average days year-round [100]. High ambient temperatures cause morbidity and mortality due  
547 to heat stress, whilst prolonged drought destroys habitat and limits food and water sources.  
548 Alongside the more obvious and conspicuous threats associated with human activities, such as  
549 car strikes, these results highlight that anthropogenically induced climate change will likely  
550 exacerbate threats to wildlife, due to the predicted higher frequency of severe weather events  
551 that have not been as prevalent in the recent evolutionary history of Australian fauna.

#### 552 *Seasonality of admissions*

553 Previous studies have shown that admissions to WRCs are markedly higher throughout  
554 the breeding season of included taxa (commonly occurring in spring) [5, 13, 47, 85, 101, 102].  
555 As the weather begins to warm, many native species begin courtship and mating, prior to  
556 nesting, giving birth and carrying young. Some young may also go through weaning, and later  
557 disperse during the spring and summer months. Studies of birds and mammals in WRCs in  
558 South Africa and Colorado exhibited peaks in overall and orphaned/juvenile admissions during  
559 their common breeding season [17, 63]. The same trend was also apparent in a 15-year  
560 longitudinal study of little owls in Spain in which orphaned young were the most common CFA  
561 overall [13]. Furthermore, peak admissions were also reported for reptiles in late spring in  
562 Victoria, Australia [8]. We observed similar increases in admissions in our study, with higher  
563 admission rates overall during the spring months (September, October, November; mean  
564 difference of 356.8 from autumn;  $p < 0.001$ ). The precise timing of species-specific admission  
565 peaks varied between animal groups which is likely a reflection of the relative length of  
566 breeding seasons, mating and nesting habits, gestation period, and time to independence for

567 different taxa. Peak periods of juvenile dispersal also coincide with influxes of holidaying  
568 families and tourist drawn to the Sunshine Coast region, for the summer Christmas holiday  
569 period (December and January), resulting in increased human activity and motor vehicle use.  
570 We believe this cyclical, transient population increase and its effects on wildlife can be used to  
571 predict the long-term effects of ongoing urbanisation in the area and further highlight the need  
572 for proactive conservation management to be a paramount consideration in short and long term  
573 town planning for the region.

#### 574 *Limitations and future directions*

575 The primary but unavoidable limitation of this study lies in the fact that causes for  
576 morbidity that occur in close proximity to or are directly due to human activities are strongly  
577 selected for in our study. Car strikes, entanglements, domestic dog and cat attacks, window hits  
578 and mower strikes are all examples of this bias, with displacements from normal habitat also  
579 potentially bringing animals into closer proximity with humans and their activities. Further,  
580 charismatic and non-threatening animals such as possums and several birds are more likely to  
581 be admitted to WRC's than seemingly dangerous, unpredictable or large animals such as  
582 snakes, kangaroos and large reptiles. These limitations are common among these types of  
583 studies and have been raised by other authors [19]. Importantly, they highlight the significant  
584 impact of human activities on wildlife welfare and the need for awareness and education. There  
585 may also be a related bias toward diurnal animals, as humans are more likely to present injured  
586 animals during the day.

587 Some CFA categories are likely under-represented or may be mis-categorised. One  
588 example is cat attack admissions, whereby the devastating effects of domestic and feral cat  
589 predation on Australian wildlife are well established [81], however their mode of predation  
590 often results in mortality or injury in a manner that does not result in WRC admission [84], or

591 were omitted entirely from our study because they were DOA. This is also likely to be true of  
592 fox predation, leading to under-representation within this dataset. Disease may also be under-  
593 represented: for example, reptile viral disease is often undetected if funding is unavailable to  
594 carry out specific diagnostic tests, and botulism in birds may be placed into the poison category.

595         Whilst other studies have also reported the age and sex breakdown of admissions and  
596 outcomes of particular species, the emphasis of this study was on longitudinal data for a range  
597 of diverse species and therefore did not focus at that level of detail. Future studies within the  
598 region and comparative studies between regions could focus on age and sex as factors  
599 contributing to admissions and outcomes of certain species or animal groups. This data can  
600 also be mined as a tool for general wildlife monitoring.

601         Lastly, many admissions were eliminated from our analysis. This included cases in  
602 which a single cause for admission could not be distinguished. Again, this appears to be  
603 common practise in this style of study, and authors have addressed this differently. For  
604 example, by combining all traumas, or by including an “unknown” or “other” category. We  
605 opted to include as many clearly delineated admission categories as possible, based on  
606 information given upon presentation that is clarified by veterinary examination. Some CFA  
607 frequently occur together, such as car strikes of the mother leading to orphaned young, which  
608 further confounds exact numbers in each category. We predict that in cases where more than  
609 one CFA may be evident, the animal had a lower chance for survival, as studies have shown  
610 that trauma severity increases mortality risk [47]. Our subset analysis of CFA before and after  
611 the changes to data capture methods at AZWH, showed that, by and large, the top six CFA  
612 have remained constant (Supporting Table 5), primarily affecting the overt signs of disease  
613 category, admissions for which increased dramatically following this change (Supporting  
614 Figure 3, Supporting Table 5). The main impact was thus on the proportion of admissions we

615 could include in our final dataset due to a more complete reporting system. However, overall  
616 sample sizes were robust, and the main findings of this study were not impacted.

## 617 Conclusion

618 From our retrospective longitudinal study of wildlife admissions to a WRC, it is clear  
619 that direct and indirect human-related factors are key drivers of morbidity and mortality of  
620 wildlife in Australia. Car strikes, entanglements and attacks by domestic pets accounted for  
621 over 80% of all admissions, and together these admission categories had low survival rates  
622 compared to “natural” causes for admission.

623 We observed a steady increase in the number of admissions to AZWH that mirrors the  
624 increasing human population in the corresponding area. Whilst we did not directly measure  
625 habitat-fragmentation and -loss in this study, its effects are evident and the continued  
626 population growth and consequential urban expansion in this area will inevitably be  
627 accompanied by land clearing and habitat modification. We predict that without intervention,  
628 this will result in a continued increase in admissions and ultimately, the ongoing decline of  
629 local wildlife populations.

630 Given the above, it stands to reason that substantial, human-driven conservation  
631 management is required to minimise the collateral damage wrought by modern civilisation.  
632 Hence, proactive and strategic management efforts to mitigate threats to biodiversity, and to  
633 the survival of wild populations of native species are an imminent and critical need, and it is  
634 also critical that these are underpinned by overarching legislative control and policy to balance  
635 the needs for human development alongside the conservation of biodiversity. Anthropogenic  
636 threats may be minimised by thoughtful landscape scale planning, incorporating biological  
637 corridors, strategic habitat restoration and defragmentation, as well as measures to minimise  
638 the spread of infectious diseases. Education, awareness and fundraising campaigns regarding

639 thoughtful pet ownership alongside wildlife friendly driving habits and conservation strategies  
640 that aim to mitigate threats posed by feral animals will also be a step toward ameliorating the  
641 detrimental effects of human activities on wildlife. Without significant action, we are likely to  
642 are likely to see indelible changes to the unique Australian biota including more human-  
643 induced localised extinctions and the decline of species that are currently deemed ‘common’.

644

## 645 Figure legends

646 **Figure 1:** Location of Australia Zoo Wildlife Hospital (AZWH). Map of Australian states and  
647 territories, showing the location of AZWH, with a zoomed-in image of Queensland  
648 demonstrating the common admissions area of AZWH (hashed area). Scale bar is  
649 representative for the zoomed in image.

650 **Figure 2:** Animal admissions to the Australia Zoo Wildlife Hospital between January 2006  
651 and December 2017 (inclusive). (a) Number of admissions per species or multi-species group.  
652 Taxa are ordered within their animal groups by abundance. Taxa are coloured based on higher  
653 classifications; see legend. (b) Total admissions per month (left axis) and per year (right axis).  
654 The increase in human population in the region is also overlaid (grey dashed lines); one one-  
655 hundredth of the total is represented (right axis). (c) Number of monthly admissions per animal  
656 group. Taxa are coloured based on higher taxonomic classifications; see legend.

657 **Figure 3:** Admissions to AZWH in each CFA. All CFA are represented in descending order  
658 on the main graph (a), whilst admissions in categories that are not one of the top six CFA are  
659 provided on an additional graph, inset (b). Taxa are coloured based on higher taxonomic  
660 classifications; see legend.

661 **Figure 4:** Annual (a) and seasonal (b) animal admissions to AZWH for the top six CFA. Trend  
662 lines are included in (a) to highlight the overall increase in admissions over the study period.  
663 See legend for CFA categories.

664 **Figure 5:** Outcomes of admission to AZWH between 2006 and 2017. (a) Proportion of total  
665 admissions for each species or multi-species group. Total annual (b) and mean  
666 monthly/seasonal (c) admissions resulting in positive outcomes and mortality. Trend lines are  
667 included in (b) to emphasise the increasing disparity between positive outcome and mortality  
668 over time.

## 669 Tables

670 **Table 1:** Summary of admissions to AZWH from 2006 to 2017.

671 **Table 2:** Admissions to AZWH in each CFA, presented as proportion of each species or multi-  
672 species group.

673 **Table 3:** Outcomes of the top six CFA.

674 **Table 4:** Odds ratio and relative risk analysis for the top six CFA, for all admissions.

675

## 676 Supporting information

### 677 *Supporting Files*

678 **Supporting file 1:** List of species and species pools (sorted into animal groups) studied  
679 between 2006 and 2017.

680 **Supporting file 2:** List of causes for admission studied between 2006 and 2017.

681 *Supporting Tables*

682 **Supporting Table 1:** Number of monthly admissions to AZWH per species or multi-species  
683 group between January 2006 and December 2017 (inclusive).

684 **Supporting Table 2:** Number of admissions to AZWH in each CFA category.

685 **Supporting Table 3:** Outcomes of the top six CFA. Raw values and proportions of admissions  
686 for each species or multi-species group are both presented.

687 **Supporting Table 4:** Odds ratio and relative risk analysis for the top six CFA, for each animal  
688 group.

689 **Supporting Table 5:** Analysis of changes to the order of the top six CFA following changes  
690 to database capture.

691

692 *Supporting Figures*

693 **Supporting Figure 1:** Animal admissions to the Australia Zoo Wildlife Hospital between  
694 January 2006 and December 2017 (inclusive). Total annual (a) and average (b) admissions per  
695 animal group. Taxa are coloured based on higher classifications; see legend.

696 **Supporting Figure 2:** Monthly animal admissions to AZWH between January 2006 and  
697 December 2017 (inclusive) for each animal group: (a) avians; (b) reptiles; (c) amphibians; (d)  
698 marsupial mammals; (e) eutherian mammals. Trend lines are included to highlight the overall  
699 increase in admissions over the study period. Note the different Y axis ranges.

700 **Supporting Figure 3:** Monthly animal admissions to AZWH between January 2006 and  
701 December 2017 (inclusive) for the top six CFA: (a) hit by car; (b) overt signs of disease; (c)  
702 orphaned/dependent young; (d) entanglements; (e) dog attacks; (f) cat attacks. Trend lines are  
703 included to highlight the overall increase in admissions over the study period. Note the different  
704 Y axis ranges.

705 **Supporting Figure 4:** Seasonality of animal admissions to AZWH between January 2006 and  
706 December 2017 (inclusive) for the top six CFA: (a) hit by car; (b) overt signs of disease; (c)  
707 orphaned/dependent young; (d) entanglements; (e) dog attacks; (f) cat attacks. The mean per  
708 animal group is shown. Taxa are coloured based on higher classifications; see legend. Note the  
709 different Y axis ranges.

710 **Supporting Figure 5:** Outcomes of the top six CFA. Values depicted are the proportions of  
711 total admissions for each species or multi-species group, for each CFA: (a) hit by car; (b) overt  
712 signs of disease; (c) orphaned/dependent young; (d) entanglements; (e) dog attacks; (f) cat  
713 attacks. Taxa are ordered per mortality rate (beige bars); note the different order for graphs (a)  
714 to (f).

715

## 716 [Acknowledgements](#)

717 We are greatly appreciative of input from the Australia Zoo Wildlife hospital, especially Kathy  
718 Whitefield. We highly value the continued contribution of volunteers and wildlife carers.

## 719 [Author contributions](#)

720 ATB analysed and interpreted the data and wrote the manuscript. RB and AG assisted in data  
721 interpretation and wrote the manuscript. EM conducted database extraction and wrote the  
722 manuscript. RB, AG, SO, AP and GC conceived the study and wrote the manuscript. All  
723 authors reviewed the manuscript.

## 724 [Funding](#)

725 There are no funding sources to report.



726   References

- 727   1.       Burton E, Tribe A. The Rescue and Rehabilitation of Koalas (*Phascolarctos cinereus*)  
728   in Southeast Queensland. *Animals*. 2016;6(9):56.
- 729   2.       Canfield PJ. A survey of koala road kills in New South Wales. *Journal of Wildlife*  
730   Diseases. 1991;27(4):657-60.
- 731   3.       Dique DS, Thompson J, Preece HJ, Penfold GC, de Villiers DL, Leslie RS. Koala  
732   mortality on roads in south-east Queensland: the koala speed-zone trial. *Wildlife research*.  
733   2003;30(4):419-26.
- 734   4.       Gonzalez-Astudillo V, Allavena R, McKinnon A, Larkin R, Henning J. Decline causes  
735   of Koalas in South East Queensland, Australia: a 17-year retrospective study of mortality and  
736   morbidity. *Scientific Reports*. 2017;7:42587.
- 737   5.       Griffith JE, Dhand NK, Krockenberger MB, Higgins DP. A retrospective study of  
738   admission trends of koalas to a rehabilitation facility over 30 years. *J Wildl Dis*. 2013;49(1):18-  
739   28. doi: 10.7589/2012-05-135. PubMed PMID: 23307368.
- 740   6.       Scheelings TF, Frith SE. Anthropogenic Factors Are the Major Cause of Hospital  
741   Admission of a Threatened Species, the Grey-Headed Flying Fox (*Pteropus poliocephalus*), in  
742   Victoria, Australia. *PloS one*. 2015;10(7):e0133638.
- 743   7.       Scheelings TF. Morbidity and mortality of monotremes admitted to the Australian  
744   Wildlife Health Centre, Healesville Sanctuary, Australia, 2000-2014. *Aust Vet J*.  
745   2016;94(4):121-4. doi: 10.1111/avj.12417. PubMed PMID: 27021894.
- 746   8.       Scheelings TF. Morbidity and Mortality of Reptiles Admitted to the Australian Wildlife  
747   Health Centre, Healesville Sanctuary, Australia, 2000-13. *J Wildl Dis*. 2015;51(3):712-8. doi:  
748   10.7589/2014-09-230. PubMed PMID: 26161722.

- 749 9. Woinarski JCZ, Burbidge AA, Harrison PL. Ongoing unraveling of a continental fauna:  
750 Decline and extinction of Australian mammals since European settlement. Proceedings of the  
751 National Academy of Sciences. 2015;112(15):4531-40. doi: 10.1073/pnas.1417301112.
- 752 10. Andrén H, Linnell JD, Liberg O, Andersen R, Danell A, Karlsson J, et al. Survival rates  
753 and causes of mortality in Eurasian lynx (*Lynx lynx*) in multi-use landscapes. Biological  
754 Conservation. 2006;131(1):23-32.
- 755 11. Erickson WP, Johnson GD, David Jr P. A summary and comparison of bird mortality  
756 from anthropogenic causes with an emphasis on collisions. 2005.
- 757 12. Ferreras P, Aldama J, Beltran J, Delibes M. Rates and causes of mortality in a  
758 fragmented population of Iberian lynx *Felis pardina* Temminck, 1824. Biological  
759 conservation. 1992;61(3):197-202.
- 760 13. Molina-López R, Darwich L. Causes of admission of little owl (*Athene noctua*) at a  
761 wildlife rehabilitation centre in Catalonia (Spain) from 1995 to 2010. Animal Biodiversity and  
762 Conservation. 2011;34(2):401-5.
- 763 14. Molina-López RA, Casal J, Darwich L. Causes of morbidity in wild raptor populations  
764 admitted at a wildlife rehabilitation centre in Spain from 1995-2007: a long term retrospective  
765 study. PLoS One. 2011;6(9):e24603.
- 766 15. Schmidt-Posthaus H, Breitenmoser-Wörsten C, Posthaus H, Bacciarini L, Breitenmoser  
767 U. Causes of mortality in reintroduced Eurasian lynx in Switzerland. Journal of Wildlife  
768 Diseases. 2002;38(1):84-92.
- 769 16. Seiler A, Helldin J. Mortality in wildlife due to transportation. The ecology of  
770 transportation: managing mobility for the environment: Springer; 2006. p. 165-89.
- 771 17. Wendell MD, Sleeman JM, Kratz G. Retrospective study of morbidity and mortality of  
772 raptors admitted to Colorado State University Veterinary Teaching Hospital during 1995 to  
773 1998. Journal of Wildlife Diseases. 2002;38(1):101-6.

- 774 18. Brand CJ. Wildlife mortality investigation and disease research: contributions of the  
775 USGS National Wildlife Health Center to endangered species management and recovery.  
776 *Ecohealth*. 2013;10(4):446-54. doi: 10.1007/s10393-013-0897-4. PubMed PMID: 24419670;  
777 PubMed Central PMCID: PMCPMC3938848.
- 778 19. Grogan A, Kelly A. A review of RSPCA research into wildlife rehabilitation. *Vet Rec*.  
779 2013;172(8):211. doi: 10.1136/vr.101139. PubMed PMID: 23436601.
- 780 20. Heigl F, Horvath K, Laaha G, Zaller JG. Amphibian and reptile road-kills on tertiary  
781 roads in relation to landscape structure: using a citizen science approach with open-access land  
782 cover data. *BMC Ecol*. 2017;17(1):24. doi: 10.1186/s12898-017-0134-z. PubMed PMID:  
783 28651557; PubMed Central PMCID: PMCPMC5485744.
- 784 21. Loss SR, Will T, Marra PP. The impact of free-ranging domestic cats on wildlife of the  
785 United States. *Nature communications*. 2013;4:1396.
- 786 22. McRuer DL, Gray LC, Horne L-A, Clark EE. Free-roaming cat interactions with  
787 wildlife admitted to a wildlife hospital. *The Journal of Wildlife Management*. 2017;81(1):163-  
788 73. doi: 10.1002/jwmg.21181.
- 789 23. Montesdeoca N, Calabuig P, Corbera JA, Oros J. A long-term retrospective study on  
790 rehabilitation of seabirds in Gran Canaria Island, Spain (2003-2013). *PLoS One*.  
791 2017;12(5):e0177366. doi: 10.1371/journal.pone.0177366. PubMed PMID: 28475653;  
792 PubMed Central PMCID: PMCPMC5419649.
- 793 24. Schenk AN, Souza MJ. Major anthropogenic causes for and outcomes of wild animal  
794 presentation to a wildlife clinic in East Tennessee, USA, 2000-2011. *PLoS One*.  
795 2014;9(3):e93517. doi: 10.1371/journal.pone.0093517. PubMed PMID: 24686490; PubMed  
796 Central PMCID: PMCPMC3970955.
- 797 25. Tejera G, Rodriguez B, Armas C, Rodriguez A. Wildlife-vehicle collisions in Lanzarote  
798 Biosphere Reserve, Canary Islands. *PLoS One*. 2018;13(3):e0192731. doi:

- 799 10.1371/journal.pone.0192731. PubMed PMID: 29561864; PubMed Central PMCID:  
800 PMC5862401.
- 801 26. Morner T. Health Monitoring and Conservation of Wildlife in Sweden and Northern  
802 Europe. *Annals of the New York Academy of Science*. 2002;969:34-8.
- 803 27. United Nations. *World Population Prospects: The 2017 Revision, Key Findings and*  
804 *Advance Tables*. In: Department of Economic and Social Affairs PD, editor. New York:  
805 Working Paper No. ESA/P/WP/248; 2017.
- 806 28. Ceballos G, Ehrlich PR. Mammal population losses and the extinction crisis. *Science*.  
807 2002;296(5569):904-7.
- 808 29. Ceballos G, García A, Ehrlich PR. The sixth extinction crisis: loss of animal  
809 populations and species. *Journal of Cosmology*. 2010;8(1821):31.
- 810 30. Barnosky AD, Matzke N, Tomiya S, Wogan GO, Swartz B, Quental TB, et al. Has the  
811 Earth's sixth mass extinction already arrived? *Nature*. 2011;471(7336):51-7.
- 812 31. Lewis OT. Climate change, species–area curves and the extinction crisis. *Philosophical*  
813 *Transactions of the Royal Society of London B: Biological Sciences*. 2006;361(1465):163-71.
- 814 32. Ceballos G, Ehrlich PR, Barnosky AD, García A, Pringle RM, Palmer TM. Accelerated  
815 modern human–induced species losses: Entering the sixth mass extinction. *Science advances*.  
816 2015;1(5):e1400253.
- 817 33. Lowry H, Lill A, Wong BB. Behavioural responses of wildlife to urban environments.  
818 *Biol Rev Camb Philos Soc*. 2013;88(3):537-49. doi: 10.1111/brv.12012. PubMed PMID:  
819 23279382.
- 820 34. McKinney ML. Urbanization, Biodiversity, and Conservation: The impacts of  
821 urbanization on native species are poorly studied, but educating a highly urbanized human  
822 population about these impacts can greatly improve species conservation in all ecosystems.

- 823 BioScience. 2002;52(10):883-90. doi: doi.org/10.1641/0006-  
824 3568(2002)052[0883:UBAC]2.0.CO;2.
- 825 35. McDonald R, Marcotullio P. Global Effects of Urbanization on Ecosystem Services.  
826 In: Niemelä J, Breuste JH, Elmqvist T, Guntenspergen G, James P, McIntyre NE, editors.  
827 Urban Ecology: Patterns, Processes, and Applications: Oxford Scholarship Online; 2011.
- 828 36. Lai S, Loke LHL, Hilton MJ, Bouma TJ, Todd PA. The effects of urbanisation on  
829 coastal habitats and the potential for ecological engineering: A Singapore case study. Ocean  
830 Coast Manage. 2015;103:78-85. doi: 10.1016/j.ocecoaman.2014.11.006. PubMed PMID:  
831 WOS:000347769600009.
- 832 37. Finn HC, Stephens NS. The invisible harm: land clearing is an issue of animal welfare.  
833 Wildlife Research. 2017;44(5):377. doi: 10.1071/wr17018.
- 834 38. Gebreab SZ, Vienneau D, Feigenwinter C, Ba H, Cisse G, Tsai MY. Spatial air  
835 pollution modelling for a West-African town. Geospat Health. 2015;10(2):321. doi:  
836 10.4081/gh.2015.321. PubMed PMID: 26618306.
- 837 39. Moiron M, González-Lagos C, Slabbekoorn H, Sol D. Singing in the city: high song  
838 frequencies are no guarantee for urban success in birds. Behavioural Ecology. 2015;26(3):843-  
839 50. doi: doi.org/10.1093/beheco/arv026.
- 840 40. Gaston KJ, Visser ME, Hölker F. The biological impacts of artificial light at night: the  
841 research challenge. Philosophical Transactions of the Royal Society B. 2015;370(1667). doi:  
842 10.1098/rstb.2014.0133.
- 843 41. Andersson MN, Wang H-L, Nord A, Salmón P, Isaksson C. Composition of  
844 physiologically important fatty acids in great tits differs between urban and rural populations  
845 on a seasonal basis. Frontiers in Ecology and Evolution. 2015;3(93). doi:  
846 10.3389/fevo.2015.00093.

- 847 42. Isaksson C. Urbanization, oxidative stress and inflammation: a question of evolving,  
848 acclimatizing or coping with urban environmental stress. *Functional Ecology*. 2015;29(7):913-  
849 23. doi: 10.1111/1365-2435.12477
- 850 43. Brahmia Z, Scheifler R, Crini N, Maas S, Giraudoux P, Benyacoub S. Breeding  
851 performance of blue tits (*Cyanistes caeruleus ultramarinus*) in relation to lead pollution and  
852 nest failure rates in rural, intermediate, and urban sites in Algeria. *Environ Pollut*.  
853 2013;174:171-8. doi: 10.1016/j.envpol.2012.11.028. PubMed PMID: 23262073.
- 854 44. Sumasgutner P, Nemeth E, Tebb G, Krenn HW, Gamauf A. Hard times in the city -  
855 attractive nest sites but insufficient food supply lead to low reproduction rates in a bird of prey.  
856 *Front Zool*. 2014;11:48. doi: 10.1186/1742-9994-11-48. PubMed PMID: 24872836; PubMed  
857 Central PMCID: PMC4035672.
- 858 45. Steyn L, Maina JN. Comparison of the numbers of free (surface) macrophages in the  
859 respiratory systems of three species of birds in an urban and a rural area of South Africa. *Journal*  
860 *of Ornithology*. 2015;156(4):1085-93.
- 861 46. Salafsky N, Salzer D, Stattersfield AJ, HILTON-TAYLOR C, Neugarten R, Butchart  
862 SH, et al. A standard lexicon for biodiversity conservation: unified classifications of threats  
863 and actions. *Conservation Biology*. 2008;22(4):897-911.
- 864 47. Mullineaux E. Veterinary treatment and rehabilitation of indigenous wildlife. *J Small*  
865 *Anim Pract*. 2014;55(6):293-300. doi: 10.1111/jsap.12213. PubMed PMID: 24725160.
- 866 48. Pyke GH, Szabo JK. Conservation and the 4 Rs, which are rescue, rehabilitation,  
867 release, and research. *Conserv Biol*. 2018;32(1):50-9. doi: 10.1111/cobi.12937. PubMed  
868 PMID: 28328146.
- 869 49. Bouchon-Small A. The rescue and rehabilitation of wildlife in South East Queensland  
870 with a case study of the birds of prey: University of Queensland; 2015 (Thesis).

- 871 50. Martínez JC, Rosique AI, Royo MS. Causes of admission and final dispositions of  
872 hedgehogs admitted to three Wildlife Rehabilitation Centers in eastern Spain. *Hystrix*, the  
873 Italian Journal of Mammalogy. 2014;25(2):107-10. doi: 10.4404/hystrix-25.2-10248.
- 874 51. Hamer AJ, McDonnell MJ. The response of herpetofauna to urbanization: Inferring  
875 patterns of persistence from wildlife databases. *Austral Ecology*. 2010;35(5):568-80. doi:  
876 doi:10.1111/j.1442-9993.2009.02068.x.
- 877 52. Pyke GH, Szabo JK. What can we learn from untapped wildlife rescue databases? The  
878 masked lapwing as a case study. *Pacific Conservation Biology*. 2018;24(2):148. doi:  
879 10.1071/pc18003.
- 880 53. Sleeman J. Use of wildlife rehabilitation centers as monitors of ecosystem health. *Zoo*  
881 *and wild animal medicine*. 2008;6:97-104.
- 882 54. Trocini S, Pacioni C, Warren K, Butcher J, Robertson I. Wildlife disease passive  
883 surveillance: the potential role of wildlife rehabilitation centres. National Wildlife  
884 Rehabilitation Conference; Canberra, ACT, Australia2008.
- 885 55. Molina-Lopez RA, Darwich L. Causes of admission of little owl (*Athene noctua*) at a  
886 wildlife rehabilitation centre in Catalonia (Spain) from 1995 to 2010. *Animal Biodiversity and*  
887 *Conservation*. 2011;34(2):401-5.
- 888 56. Rodríguez B, Rodríguez A, Siverio F, Siverio M. Causes of Raptor Admissions to a  
889 Wildlife Rehabilitation Center in Tenerife (Canary Islands). *Journal of Raptor Research*.  
890 2009;44(1):30-9. doi: doi.org/10.3356/JRR-09-40.1.
- 891 57. Santos SM, Lourenco R, Mira A, Beja P. Relative effects of road risk, habitat  
892 suitability, and connectivity on wildlife roadkills: the case of tawny owls (*Strix aluco*). *PLoS*  
893 *One*. 2013;8(11):e79967. doi: 10.1371/journal.pone.0079967. PubMed PMID: 24278226;  
894 PubMed Central PMCID: PMC3836987.

- 895 58. Burton DL, Dobar KA, editors. Morbidity and mortality of urban wildlife in the  
896 midwestern United States. Proceedings 4th International Urban Wildlife Symposium; 2004.
- 897 59. ISO. International Organization for Standardization. Persistent stored modules  
898 (SQL/PSM). SQL2016.
- 899 60. IBM Corp. IBM SPSS Statistics for Windows, Version 24.0. Armonk, NY: IBM Corp.;  
900 2016.
- 901 61. RSPCA: Wildlife Hospital; What we do 2017 [22/05/2018]. Available from:  
902 <https://www.rspcaqld.org.au/what-we-do/care-for-animals/wildlife-hospital>
- 903 62. Currumbin Wildlife Hospital Foundation: Wildlife Hospital 2018 [22/05/2018].  
904 Available from: <http://cwhf.org.au/wildlife-hospital/>.
- 905 63. Wimberger K, Downs CT. Annual intake trends of a large urban animal rehabilitation  
906 centre in South Africa: a case study. *Animal Welfare*. 2010;19:501-13.
- 907 64. Molina-Lopez RA, Casal J, Darwich L. Causes of morbidity in wild raptor populations  
908 admitted at a wildlife rehabilitation centre in Spain from 1995-2007: a long term retrospective  
909 study. *PLoS One*. 2011;6(9):e24603. doi: 10.1371/journal.pone.0024603. PubMed PMID:  
910 21966362; PubMed Central PMCID: PMC3179465.
- 911 65. da Rosa CA, Bager A. Seasonality and habitat types affect roadkill of neotropical birds.  
912 *J Environ Manage*. 2012;97:1-5. doi: 10.1016/j.jenvman.2011.11.004. PubMed PMID:  
913 22325576.
- 914 66. Census update: Sunshine Coast. In: Housing ABoSCoPa, editor. 2016.
- 915 67. Sunshine Coast Business Council: Sunshine Coast Region [Internet]. 2012 [cited  
916 22/05/2018]. Available from: <https://scbusinesscouncil.com.au/sunshine-coast-region/>
- 917 68. Woinarski J, Burbidge AA. *Phascolarctos cinereus*. The IUCN Red List of Threatened  
918 Species 2016. In: IUCN, editor. 2016.



- 919 69. Beyer HL, Villiers Dd, Loader J, Robbins A, Stigner M, Forbes N, et al. Management  
920 of multiple threats achieves meaningful koala conservation outcomes. *Journal of Applied*  
921 *Ecology*. 2018;1(10). doi: DOI: 10.1111/1365-2664.13127.
- 922 70. Devereaux LN, Polkinghorne A, Meijer A, Timms P. Molecular evidence for novel  
923 chlamydial infections in the koala (*Phascolarctos cinereus*). *Systematic and applied*  
924 *microbiology*. 2003;26(2):245-53. doi: 10.1078/072320203322346092. PubMed PMID:  
925 12866851.
- 926 71. Polkinghorne A, Hanger J, Timms P. Recent advances in understanding the biology,  
927 epidemiology and control of chlamydial infections in koalas. *Vet Microbiol*. 2013;165(3-  
928 4):214-23. doi: 10.1016/j.vetmic.2013.02.026. PubMed PMID: 23523170.
- 929 72. Brunton EA, Srivastava SK, Schoeman DS, Burnett S. Quantifying trends and  
930 predictors of decline in eastern grey kangaroo (*Macropus giganteus*) populations in a rapidly  
931 urbanising landscape. *Pacific Conservation Biology*. 2018;24(1):63-73. doi:  
932 <https://doi.org/10.1071/PC17034>.
- 933 73. Ellis WA, FitzGibbon SI, Barth BJ, Niehaus AC, David GK, Taylor BD, et al. Daylight  
934 saving time can decrease the frequency of wildlife-vehicle collisions. *Biol Lett*. 2016;12(11).  
935 doi: 10.1098/rsbl.2016.0632. PubMed PMID: 27881767; PubMed Central PMCID:  
936 PMC5134043.
- 937 74. Birds in Backyards. Autumn Survey - 2018 results: BirdLife Australia; 2018  
938 [16/07/2018]. Available from: [http://www.birdsinbackyards.net/content/article/Autumn-](http://www.birdsinbackyards.net/content/article/Autumn-Survey-2018-results)  
939 [Survey-2018-results](http://www.birdsinbackyards.net/content/article/Autumn-Survey-2018-results).
- 940 75. Pest & Disease Information Service. Rainbow lorikeet: management. WA Department  
941 of Primary Industries and Regional Development. South Perth, WA, Australia 2018.

- 942 76. Raidal SR, Sarker S, Peters A. Review of psittacine beak and feather disease and its  
943 effect on Australian endangered species. *Aust Vet J.* 2015;93(12):466-70. doi:  
944 10.1111/avj.12388. PubMed PMID: 26769072.
- 945 77. McOrist S, Reece RL. Clostridial enteritis in free-living lorikeets (*Trichoglossus spp.*).  
946 *Avian Pathol.* 1992;21(3):503-7. doi: 10.1080/03079459208418868. PubMed PMID:  
947 18670965.
- 948 78. NSW Government. The danger of feeding lorikeets. 2018.
- 949 79. Queensland Land for Wildlife. Wildlife Friendly Fencing and Netting. Healthy Land  
950 and Water; 2017.
- 951 80. Burbidge AA, Abbott I. Mammals on Western Australian islands: occurrence and  
952 preliminary analysis. *Australian Journal of Zoology.* 2017;65(3):183-95. doi:  
953 <https://doi.org/10.1071/ZO17046>.
- 954 81. Woinarski JCZ, Legge S, Fitzsimons JA, Traill BJ, Burbidge AA, Fisher A, et al. The  
955 disappearing mammal fauna of northern Australia: context, cause, and response. *Conservation*  
956 *Letters.* 2011;4(3):192-201. doi: doi:10.1111/j.1755-263X.2011.00164.x.
- 957 82. Dickman CR. House cats as predators in the Australian environment: impacts and  
958 management. *Human–Wildlife Conflicts* 2009;3(1):41-8.
- 959 83. Abbott I. Origin and spread of the cat, *Felis catus* on mainland Australia, with a  
960 discussion of the magnitude of its early impact on native fauna. *Wildlife Research.*  
961 2002;29(1):51-74. doi: <https://doi.org/10.1071/WR01011>.
- 962 84. Dickman C. Overview of the impacts of feral cats on Australian native fauna. University  
963 of Sydney Institute of Wildlife Research and School of Biological Sciences for the Australian  
964 Nature Conservation Agency; 1996.

- 965 85. Ancillotto L, Serangeli MT, Russo D. Curiosity killed the bat: Domestic cats as bat  
966 predators. *Mamm Biol.* 2013;78(5):369-73. doi: 10.1016/j.mambio.2013.01.003. PubMed  
967 PMID: WOS:000323534000010.
- 968 86. Muhldorfer K, Speck S, Wibbelt G. Diseases in free-ranging bats from Germany. *BMC*  
969 *Vet Res.* 2011;7:61. doi: 10.1186/1746-6148-7-61. PubMed PMID: 22008235; PubMed  
970 Central PMCID: PMCPMC3219556.
- 971 87. Paltridge R. The diets of cats, foxes and dingoes in relation to prey availability in the  
972 Tanami Desert, Northern Territory. *Wildlife Research.* 2002;29(4):389-403. doi:  
973 <https://doi.org/10.1071/WR00010>.
- 974 88. Risbey DA, Calver MC, Short J, Bradley JS, Wright IW. The impact of cats and foxes  
975 on the small vertebrate fauna of Heirisson Prong, Western Australia. II. A field experiment.  
976 *Wildlife Research.* 2000;27(3):223-35. doi: <https://doi.org/10.1071/WR98092>.
- 977 89. Denny E, Dickman CR. Review of cat ecology and management strategies in Australia.  
978 Invasive Animals Cooperative Research Centre. Canberra, Australia; 2010.
- 979 90. Letnic M, Koch F, Gordon C, Crowther MS, Dickman CR. Keystone effects of an alien  
980 top-predator stem extinctions of native mammals. *Proc Biol Sci.* 2009;276(1671):3249-56. doi:  
981 10.1098/rspb.2009.0574. PubMed PMID: 19535372; PubMed Central PMCID:  
982 PMCPMC2817164.
- 983 91. Johnson CN, Isaac JL, Fisher DO. Rarity of a top predator triggers continent-wide  
984 collapse of mammal prey: dingoes and marsupials in Australia. *Proc Biol Sci.*  
985 2007;274(1608):341-6. doi: 10.1098/rspb.2006.3711. PubMed PMID: 17164197; PubMed  
986 Central PMCID: PMCPMC1702374.
- 987 92. Glen AS, Dickman CR, Soulé ME, Mackey BG. Evaluating the role of the dingo as a  
988 trophic regulator in Australian ecosystems. *Austral Ecology.* 2007;32(5):492-501. doi:  
989 [doi:10.1111/j.1442-9993.2007.01721.x](https://doi.org/10.1111/j.1442-9993.2007.01721.x).

- 990 93. Letnic M, Ritchie EG, Dickman CR. Top predators as biodiversity regulators: the dingo  
991 *Canis lupus dingo* as a case study. *Biological Reviews*. 2012;87(2):390-413. doi:  
992 doi:10.1111/j.1469-185X.2011.00203.x.
- 993 94. Cook TC, Blumstein DT. The omnivore's dilemma: Diet explains variation in  
994 vulnerability to vehicle collision mortality. *Biological Conservation*. 2013;167:310-5. doi:  
995 <https://doi.org/10.1016/j.biocon.2013.08.016>.
- 996 95. Brown JD, Sleeman JM. Morbidity and mortality of reptiles admitted to the Wildlife  
997 Center of Virginia, 1991 to 2000. *Journal of wildlife diseases*. 2002;38(4):699-705. doi:  
998 10.7589/0090-3558-38.4.699. PubMed PMID: 12528435.
- 999 96. Bureau of Meteorology. Queensland in December 2010: The wettest December on  
1000 record 2011 [16/05/2018]. Available from:  
1001 <http://www.bom.gov.au/climate/current/month/qld/archive/201012.summary.shtml>.
- 1002 97. Bureau of Meteorology. Brisbane in November 2016: Very warm days; dry 2016  
1003 [16/05/2018]. Available from:  
1004 <http://www.bom.gov.au/climate/current/month/qld/archive/201611.brisbane.shtml>.
- 1005 98. Bureau of Meteorology. Queensland in spring 2014: Dry over large parts of the State;  
1006 some extremely hot days 2014 [16/05/2018]. Available from:  
1007 <http://www.bom.gov.au/climate/current/season/qld/archive/201411.summary.shtml>.
- 1008 99. Bureau of Meteorology. Brisbane in November 2014: A hot month; severe  
1009 thunderstorms lash the city 2014 [16/05/2018]. Available from:  
1010 <http://www.bom.gov.au/climate/current/month/qld/archive/201411.brisbane.shtml>.
- 1011 100. Bureau of Meteorology. Annual climate statement 2017. 2018 [16/05/2018]. Available  
1012 from: <http://www.bom.gov.au/climate/current/annual/aus/>.

- 1013 101. Mullineaux E, Kidner P. Managing public demand for badger rehabilitation in an area  
1014 of England with endemic tuberculosis. *Vet Microbiol.* 2011;151(1-2):205-8. doi:  
1015 10.1016/j.vetmic.2011.02.045. PubMed PMID: WOS:000292352700029.
- 1016 102. Kelly A, Bland M. Admissions, diagnoses, and outcomes for Eurasian Sparrowhawks  
1017 (*Accipiter nisus*) brought to a wildlife rehabilitation center in England. *Journal of Raptor*  
1018 *Research.* 2006;40(3):231-5. doi: Doi 10.3356/0892-1016(2006)40[231:Adaofe]2.0.Co;2.  
1019 PubMed PMID: WOS:000241997700009.

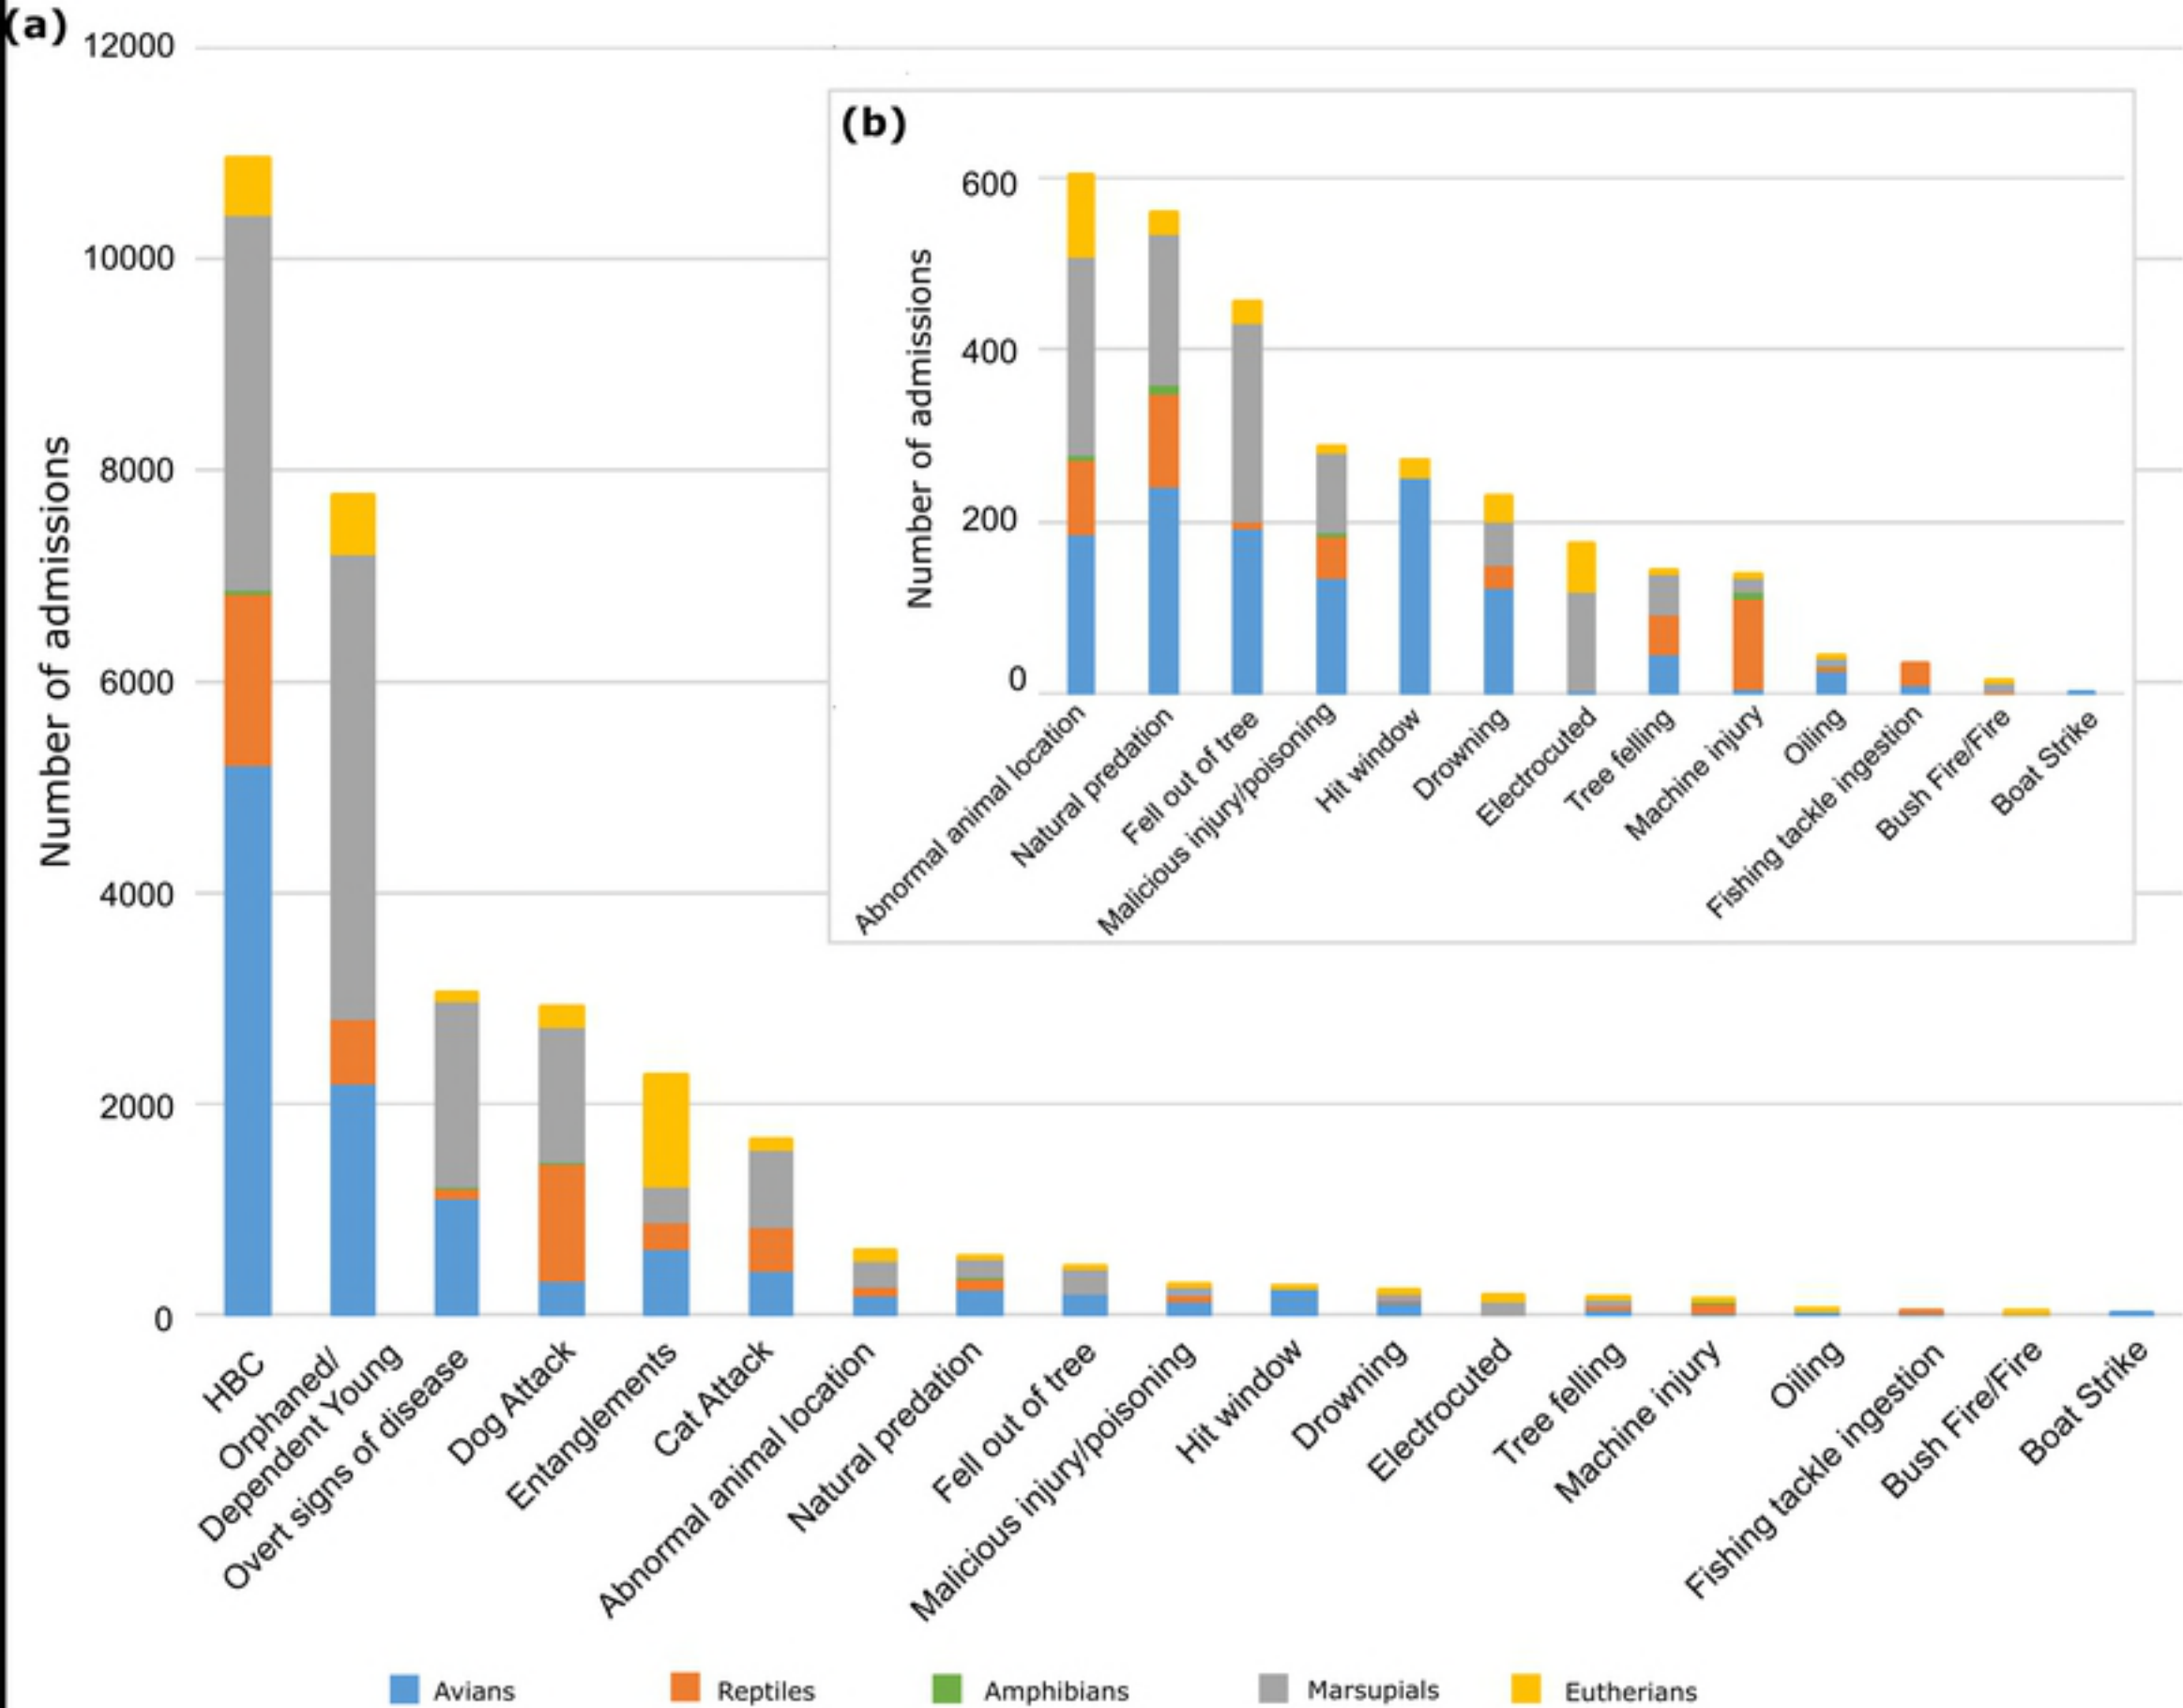

Figure 3: Admissions to AZWH in each CFA.

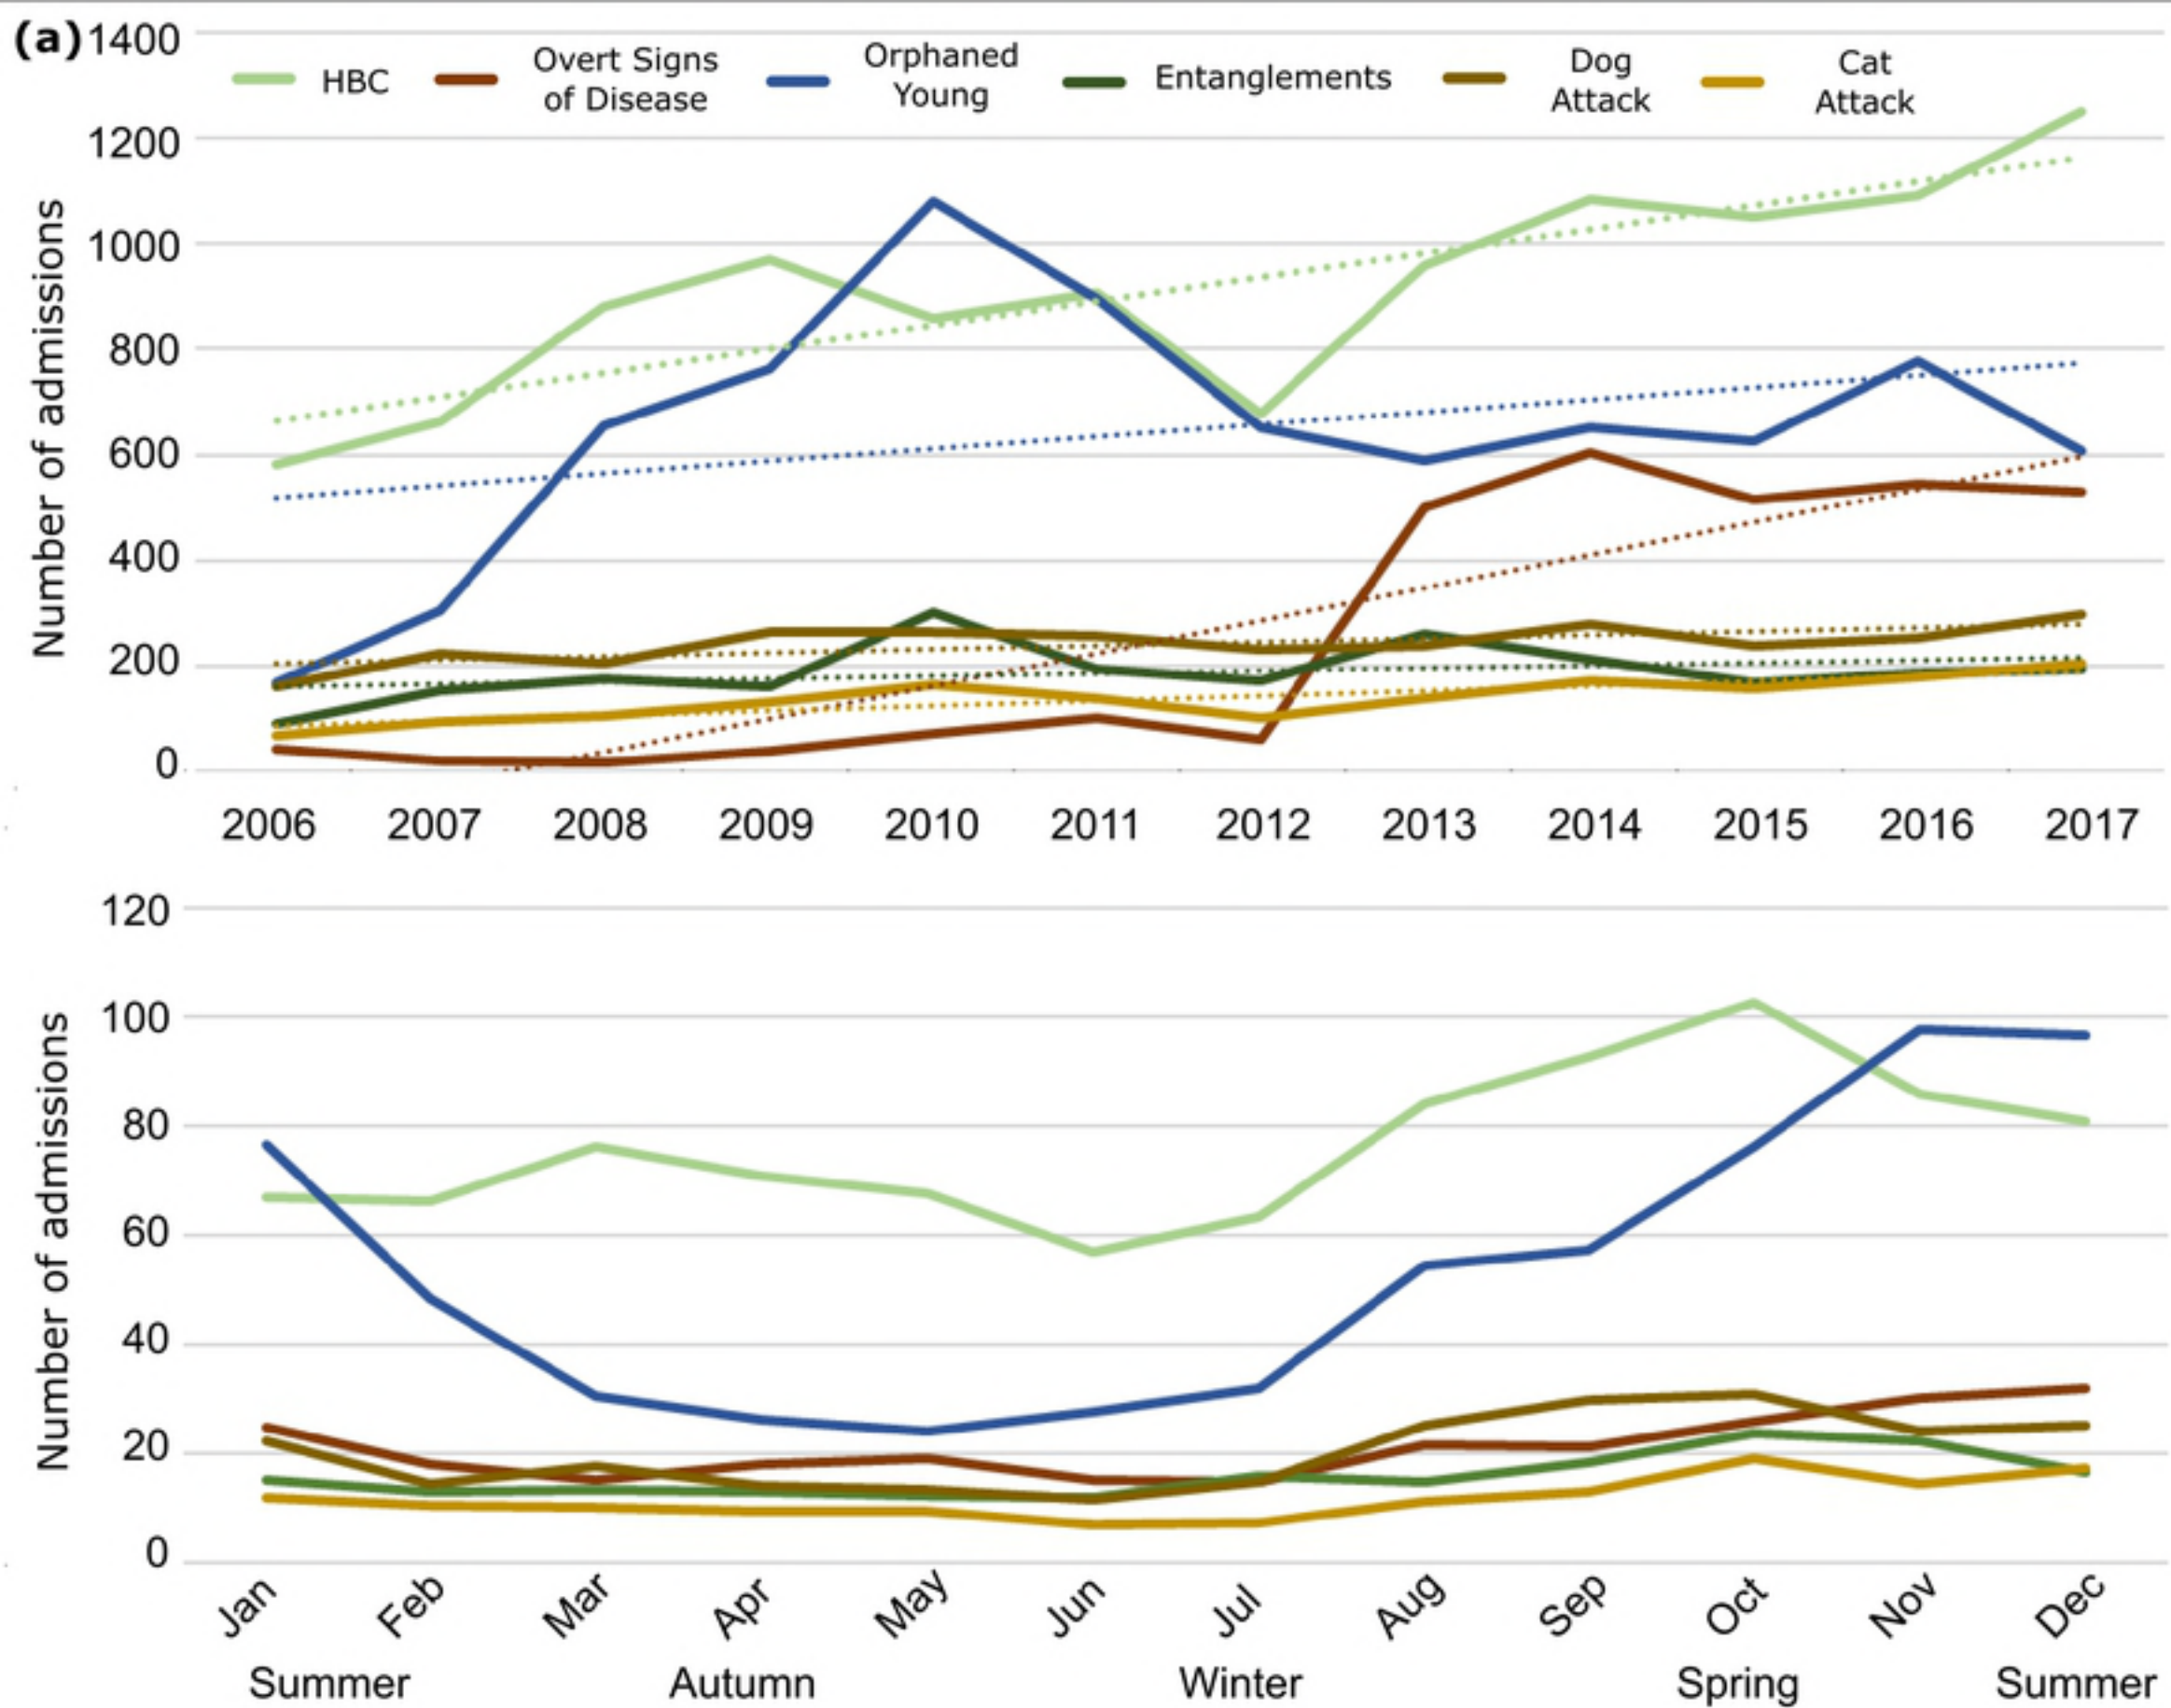

Figure 4: Annual (a) and seasonal (b) animal admissions to AZWH

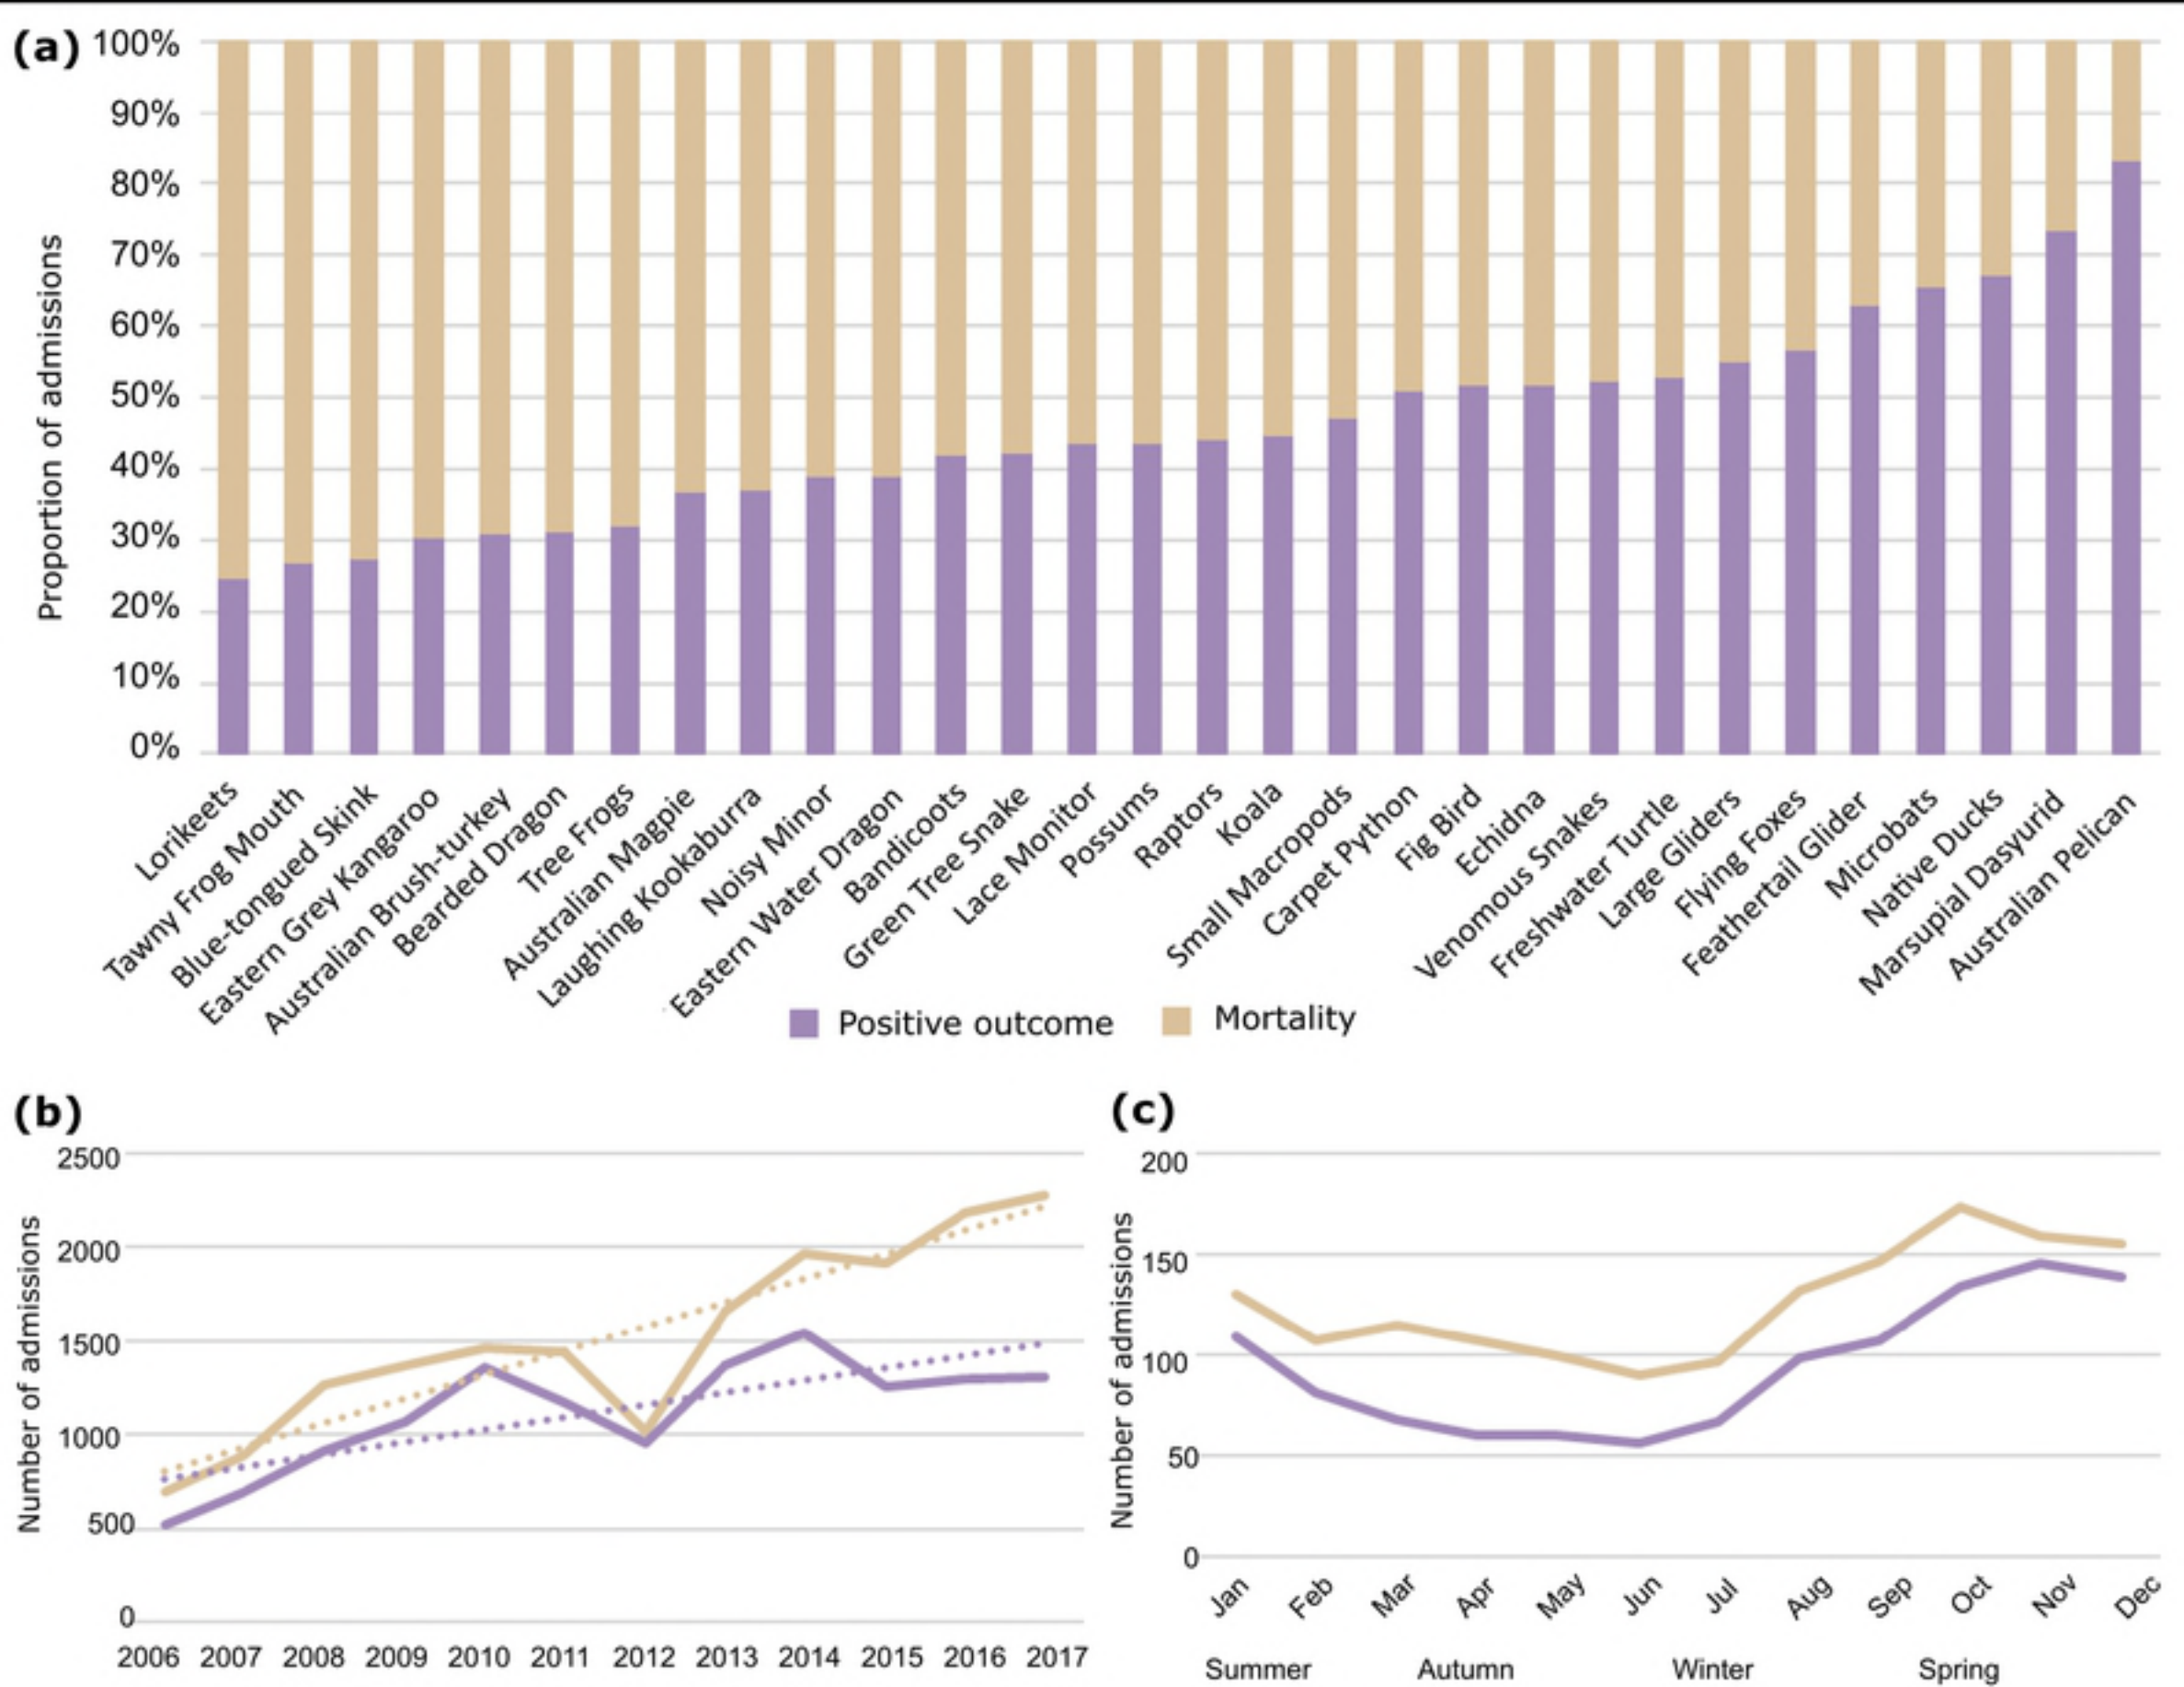

Figure 5: Outcomes of admission to AZWH between 2006 and 20



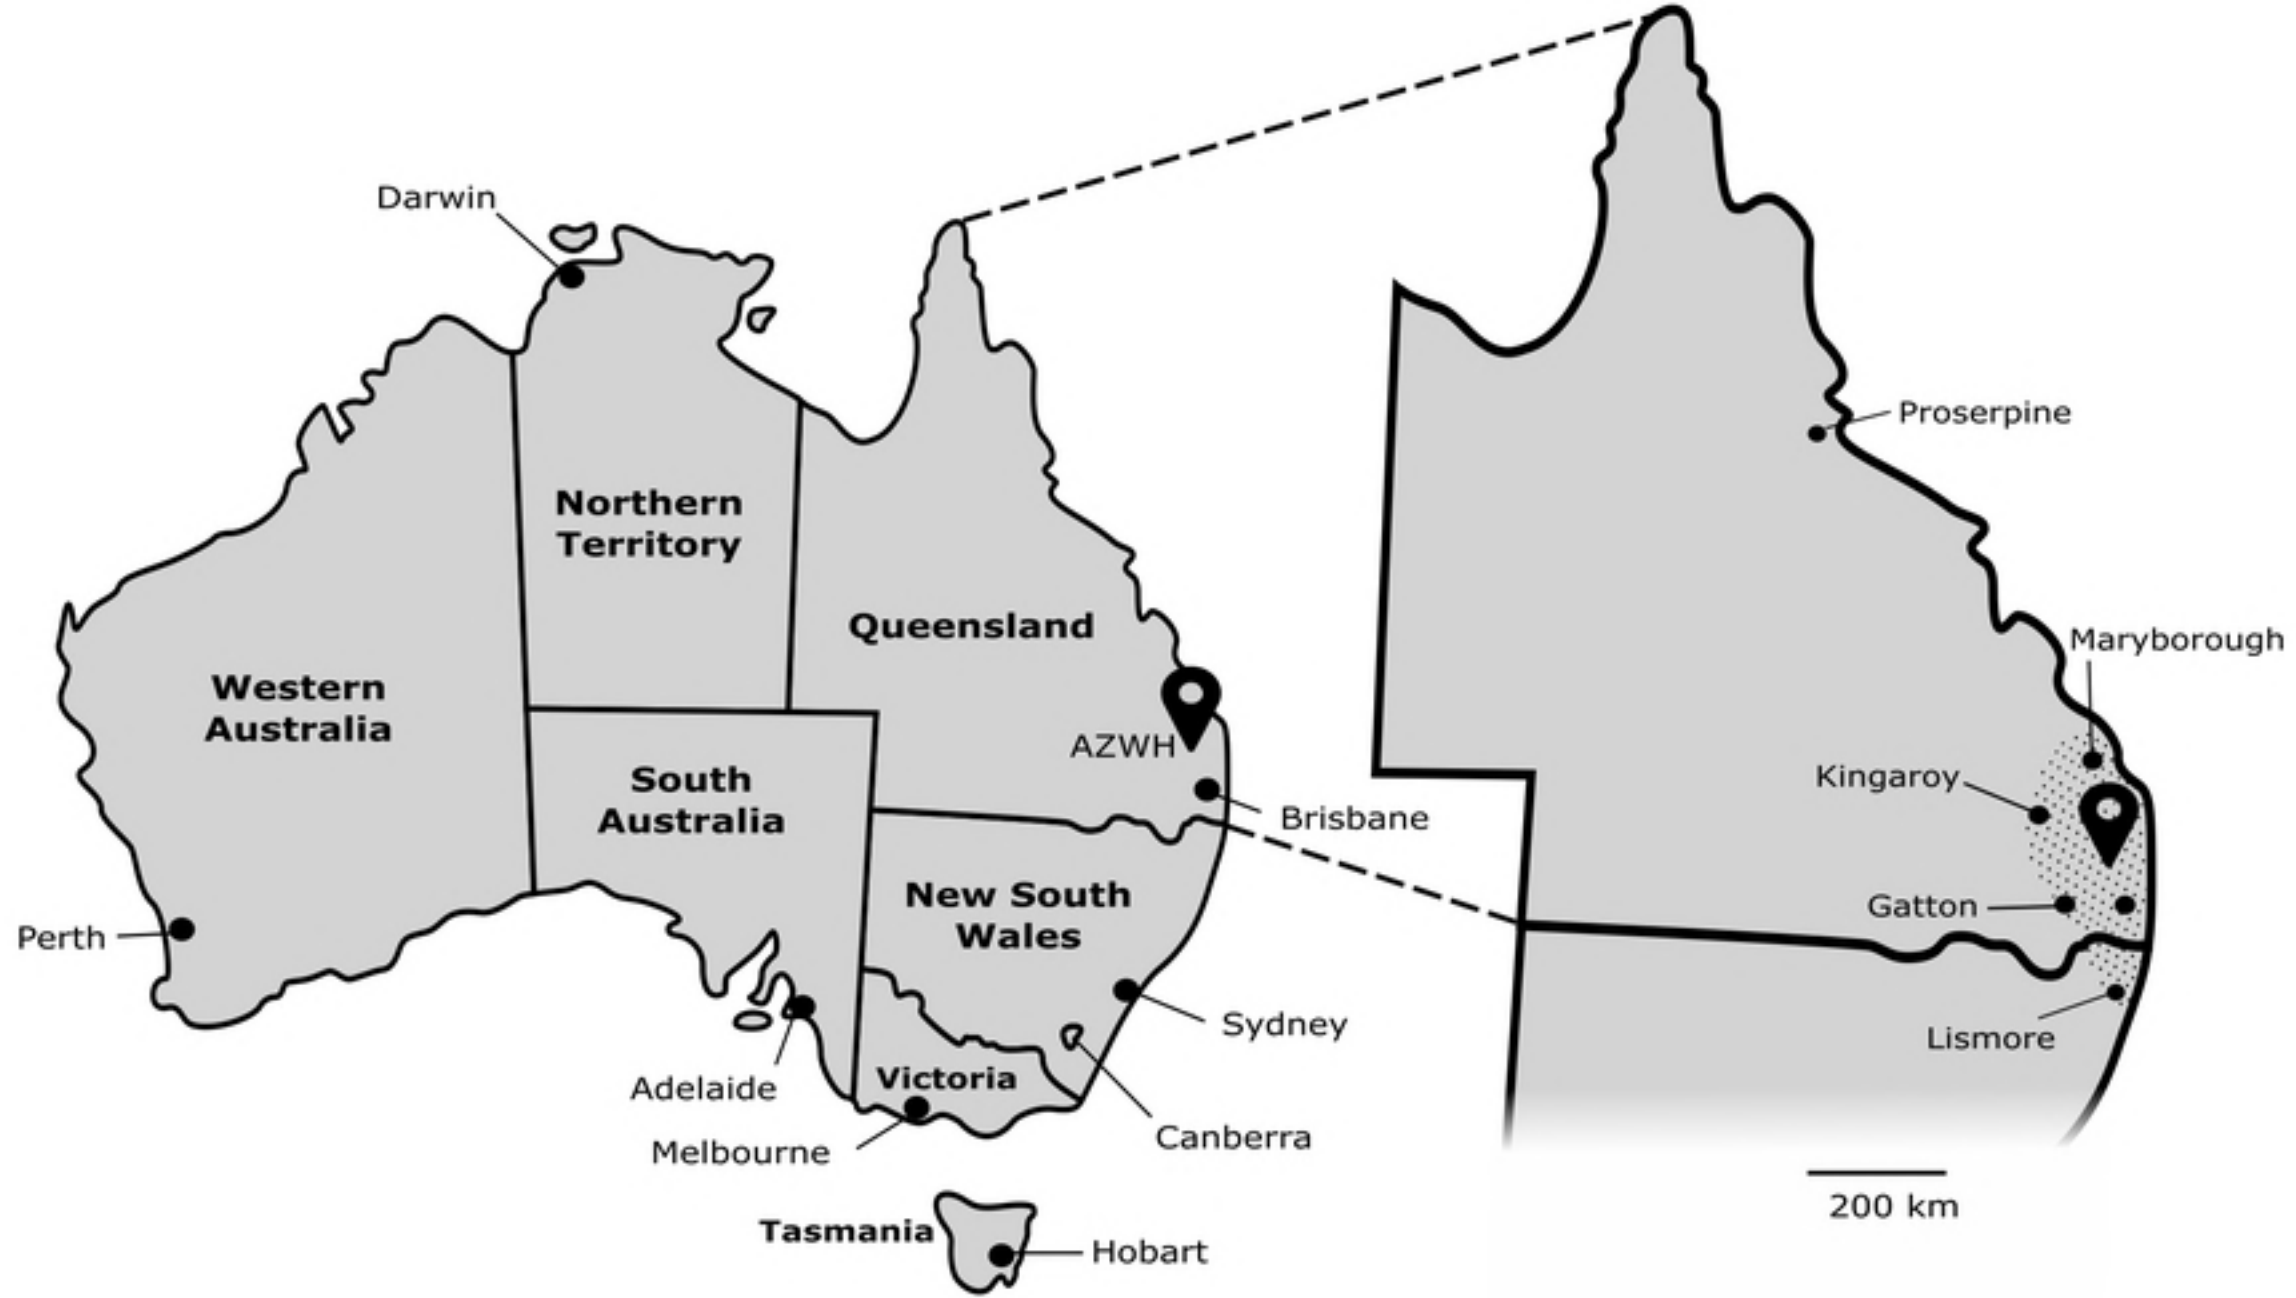

Figure 1: Location of Australia Zoo Wildlife Hospital (AZWH).

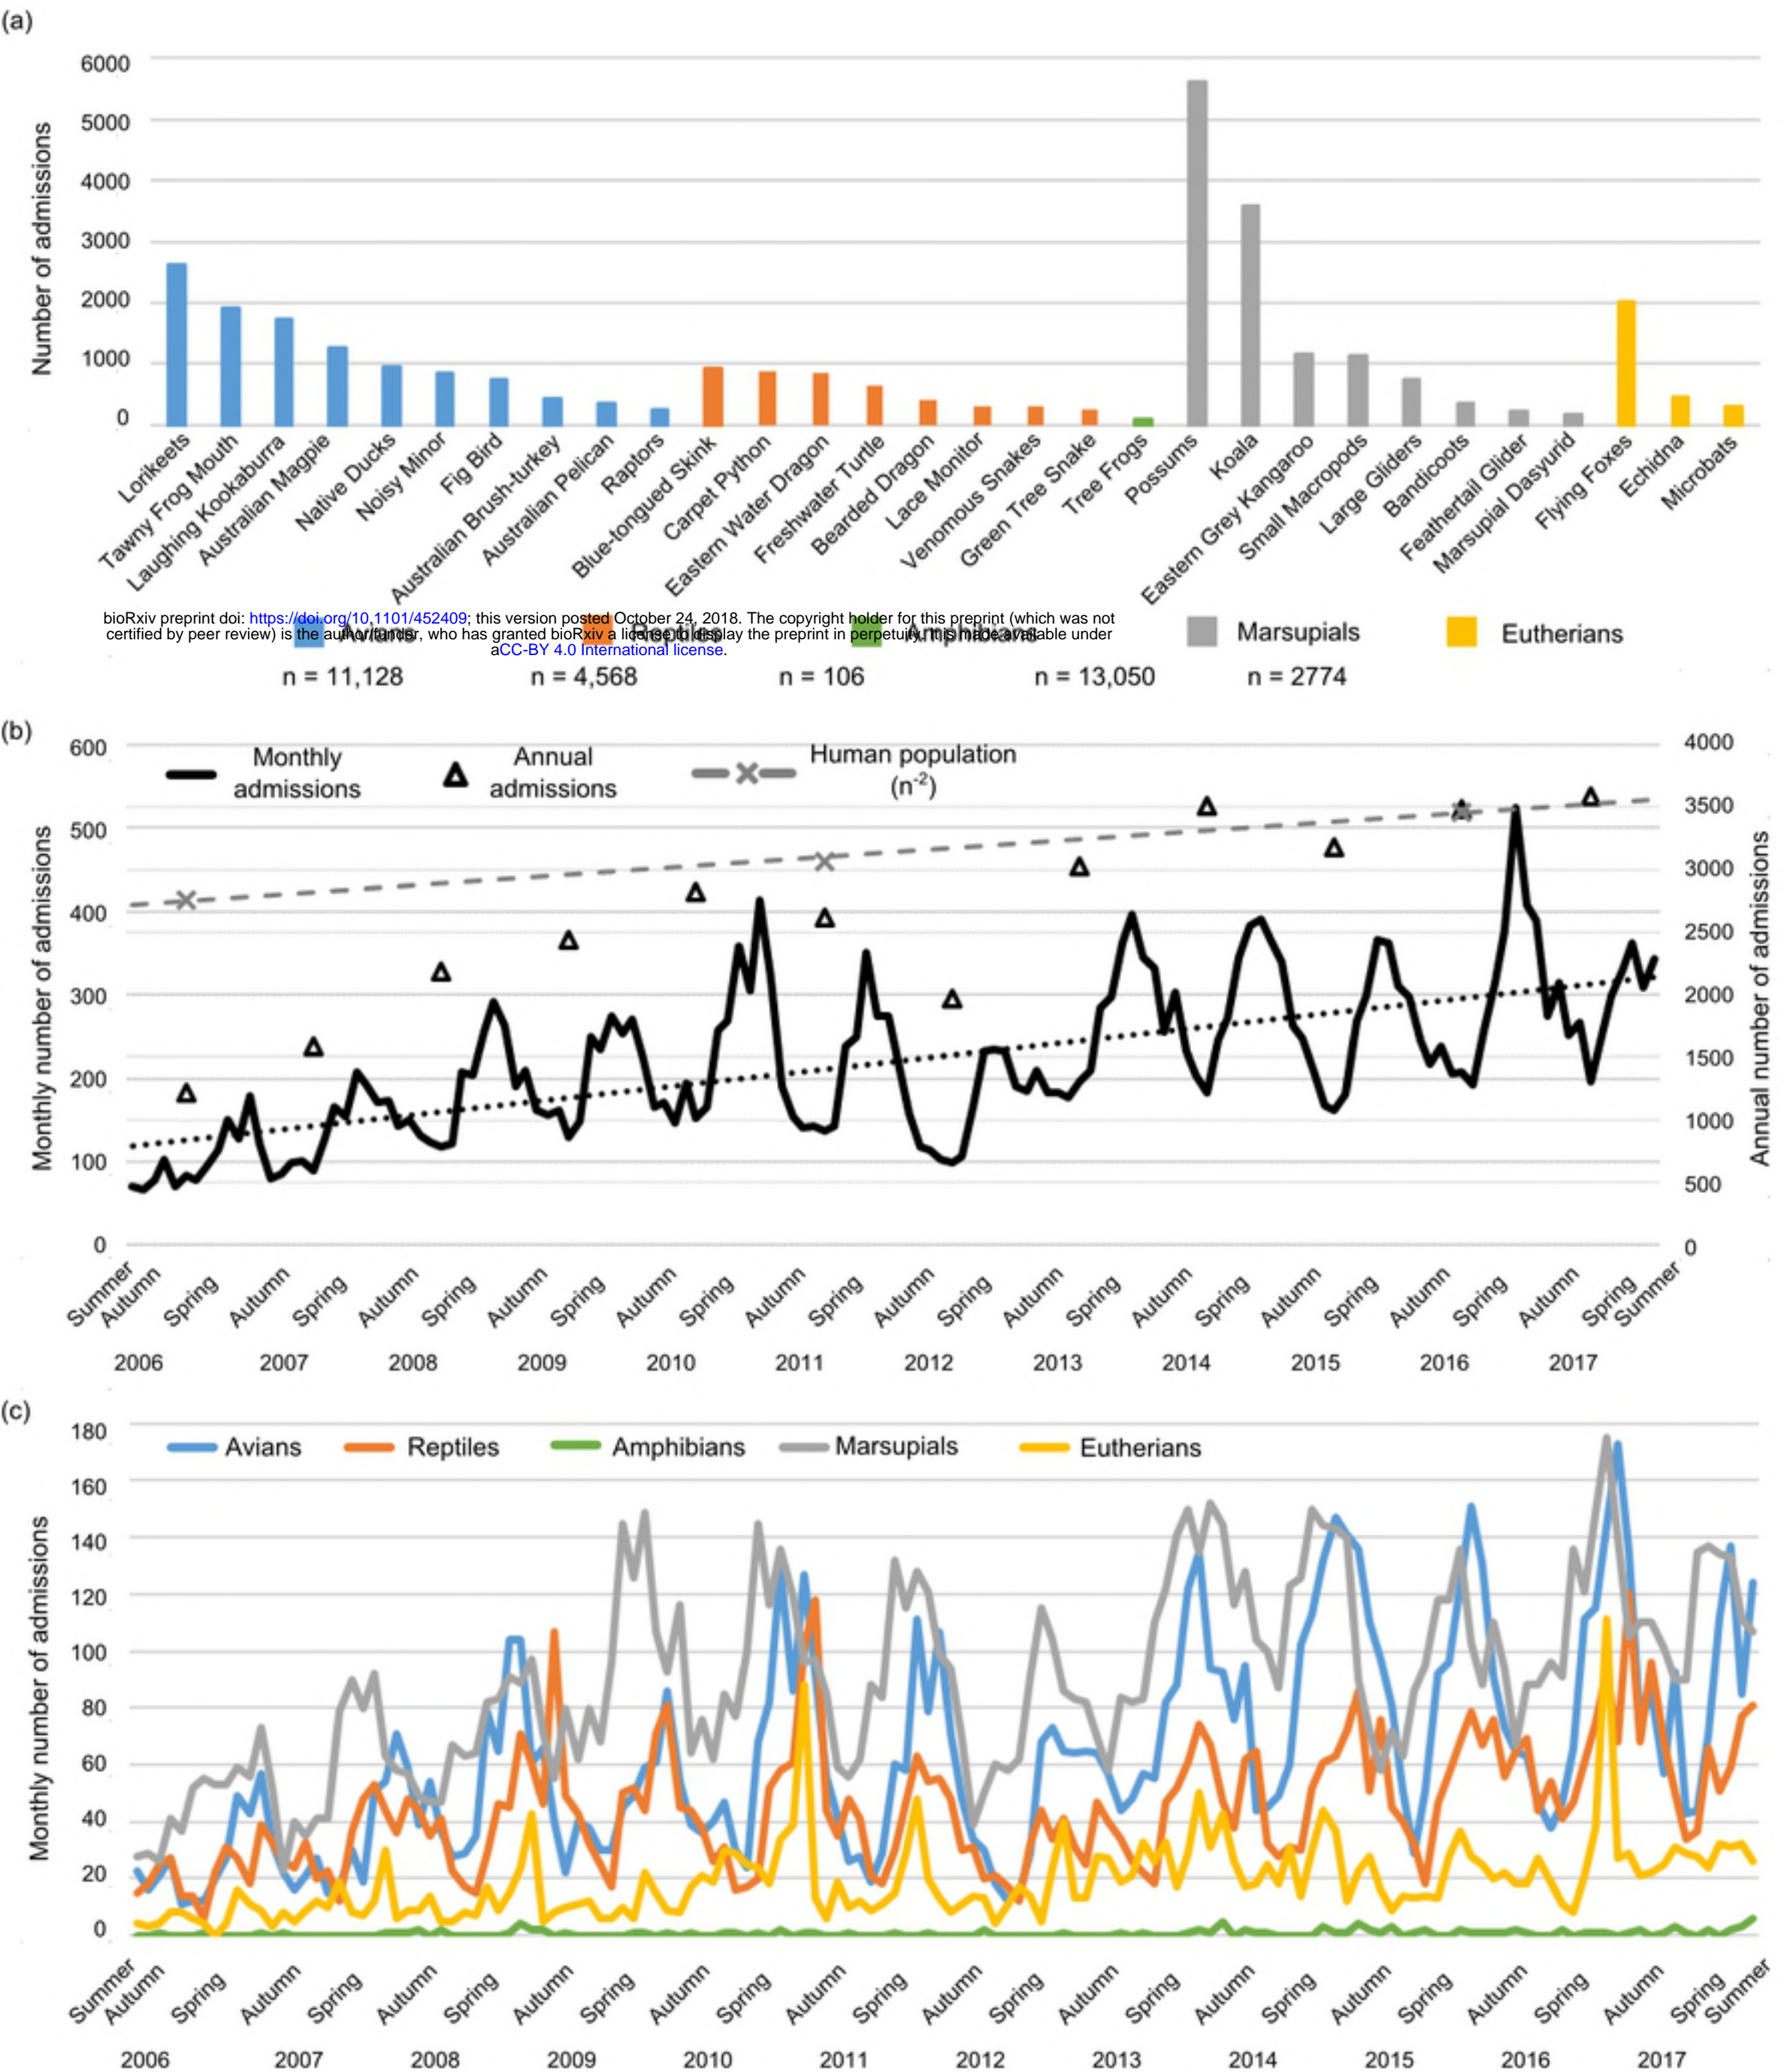

Figure 2: Animal admissions to the Australia Zoo Wildlife Hospital
